1                                    **Museum genomics illuminate the high specificity of**  
2                                    **a bioluminescent symbiosis across a genus of reef fish**

3  
4  
5                                    Alison L. Gould<sup>1\*</sup>, Allison Fritts-Penniman<sup>1</sup>, Ana Gaisiner<sup>1</sup>

6  
7                                    1. California Academy of Sciences, 55 Music Concourse Dr. San Francisco, CA 94118

8                                    \*Corresponding author: [agould@calacademy.org](mailto:agould@calacademy.org)  
9  
10

## 11 **Abstract**

12  
13 Symbiotic relationships between bioluminescent bacteria and fishes have evolved multiple times  
14 across hundreds of fish taxa, but relatively little is known about the specificity of these  
15 associations and how conserved they have been through time. This study describes the degree  
16 of specificity of a bioluminescent symbiosis between cardinalfishes in the genus *Siphamia* and  
17 luminous bacteria in the *Vibrio* family. Primarily using museum specimens, we investigate the  
18 co-divergence of host and symbiont and test for patterns of divergence that correlate with both  
19 biogeography and time. Contrary to expectations, we determined that the light organ symbionts  
20 of all 14 *Siphamia* species examined belong to one genetic clade of *Photobacterium*  
21 *mandapamensis* (Clade II), indicating that the association is highly specific and conserved  
22 across the host genus. Thus, we did not find evidence of codivergence among hosts and  
23 symbionts. We did observe that symbionts hosted by individuals sampled from colder water  
24 regions were more divergent, containing more than three times as many single nucleotide  
25 polymorphisms than the rest of the symbionts examined. Overall our findings indicate that the  
26 symbiosis between *Siphamia* fishes and *P. mandapamensis* Clade II has been highly conserved  
27 across a broad geographic range and through time despite the facultative nature of the bacterial  
28 symbiont. These results suggest that this bioluminescent symbiosis could have played a key  
29 role in the evolution of the host genus and that there are conserved mechanisms regulating its  
30 specificity that have yet to be defined.

31

## 32 **Introduction**

33  
34 Environmentally transmitted microbial symbionts are acquired by a host from a genetically  
35 diverse, free-living population of bacteria. These facultative symbionts must retain the genetic  
36 machinery necessary to associate with their hosts, while also being able to compete with the  
37 rest of the microbial community in the surrounding environment (Bright and Bulgheresi 2010). In  
38 the marine environment abiotic factors such as water flow and temperature play critically  
39 important roles in structuring the microbial community (Galand et al., 2010, Brown et al., 2012),  
40 and accordingly, the available free-living symbiont pool. Nevertheless, a colossal diversity of  
41 bacteria remains available to marine hosts, yet the associations between hosts and their  
42 microbial symbionts are highly specific; much more so than what would be expected based  
43 solely on diversity in the surrounding seawater (Trousselier et al., 2017). Thus, the combined  
44 influence of host attributes and abiotic factors contributes to the complexity of the specificity of

45 environmentally transmitted host-symbiont associations, providing the opportunity to study the  
46 evolution of specificity and co-diversification of these critical associations.

47

48 Bioluminescent symbioses have evolved multiple times across diverse squid and fish taxa,  
49 including at least 17 times in the ray-finned fishes (Davis et al., 2016; Dunlap and Urbanczyk,  
50 2013). Approximately 500 species of fish are known to be symbiotically bioluminescent, but our  
51 understanding of specificity between fish hosts and their bacterial symbionts is just emerging.  
52 Existing evidence suggests that some level of specificity between a host and luminous symbiont  
53 is maintained, at least at the host family level. For example, leiognathid fishes exclusively host  
54 *Photobacterium leiognathi* and *P. mandapamensis* (Kaeding et al. 2007), and ceratioid  
55 anglerfishes, representing four different host families sampled over a broad geographic range,  
56 hosted only two bacterial species, *Enterovibrio escacola* and *E. luxaltus* (Baker et al. 2019).  
57 Specificity has been described in 35 additional fish host species, comprising 7 families (Dunlap  
58 et al. 2007). This host family level of bacterial specificity is believed to result from the fish  
59 selecting for its particular symbiont while also preventing other bacteria from colonizing its light  
60 organ (Reichelt et al., 1977). Although fish hosts only associate with a narrow range of luminous  
61 bacteria, the symbionts are generally not obligately dependent on their host (but see Hendry et  
62 al., 2014) and can survive in a variety of other habitats including seawater, sediment, and the  
63 surfaces and digestive tracts of various marine organisms. Thus, the specificity of  
64 bioluminescent symbioses depends largely on host selectivity and the genetics of the  
65 association.

66

67 Within the cardinalfish family (Perciformes: Apogonidae), bioluminescence has evolved multiple  
68 times, however only species in the genus *Siphamia* rely on a symbiotic relationship with  
69 luminous bacteria to produce light; all other bioluminescent cardinalfishes produce their own  
70 light presumably via the acquisition of luciferin from their diet (Thacker and Roje 2009). All 25  
71 species of *Siphamia* are symbiotically bioluminescent (Thacker and Roje 2009; Gon and Allen  
72 2012). The fish possess a ventral light organ connected to the intestine, which functions to host  
73 a dense population of luminous bacteria ( $\sim 10^8$  cells) (Fig.1) (Dunlap and Nakamura 2011). The  
74 symbionts are ingested by the host during larval development and subsequently colonize the  
75 host's light organ (Dunlap et al., 2012).

76

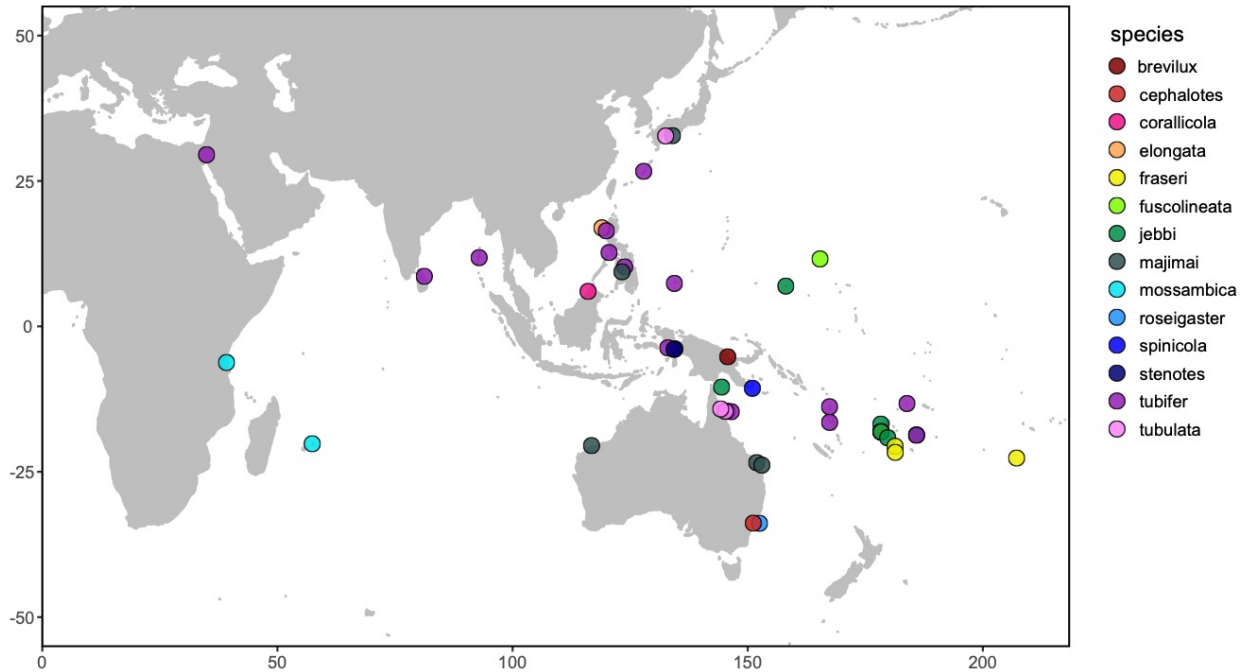

77

78 **Figure 1.** Map depicting the sampling locations of the *Siphamia* specimens examined in this study. Colors represent  
79 different *Siphamia* species as indicated in the figure legend.

80 The *Siphamia-Photobacterium* symbiosis readily lends itself to study both in the field and in the  
81 laboratory because, unlike most bioluminescent fish which occur in deep or open water  
82 environments, *Siphamia* reside in shallow waters with high habitat fidelity (Gould *et al* 2014).  
83 Furthermore, both host and symbiont can be readily cultured in captivity, making them ideal  
84 study organisms for laboratory investigations (Dunlap *et al.*, 2012). However, the luminous  
85 symbionts of only one *Siphamia* species, *S. tubifer*, originating from a small geographic region  
86 in the Okinawa Islands, Japan, have been characterized to date; the specimens examined were  
87 found to host only members of Clade II of *Photobacterium mandapamensis* in their light organs,  
88 suggesting a high degree of specificity for this association (Kaeding *et al.*, 2007, Gould and  
89 Dunlap 2019). *Siphamia tubifer* is broadly distributed throughout the Indo-Pacific, spanning from  
90 eastern Africa to the French Polynesian Islands (Gon and Allen 2012), thus the true degree of  
91 specificity across the geographic range of this association remains unknown. Furthermore, the  
92 luminous symbionts of the other 24 species in the host genus have yet to be identified.

93

94 The primary goals of this study were to characterize the degree of specificity of the  
95 bioluminescent symbiosis throughout the *Siphamia* genus and across the broad geographic  
96 range of *S. tubifer*. Taking advantage of previous collection efforts, we sampled geographically  
97 and temporally diverse *Siphamia* specimens (Fig. 2) from several natural history museums.

98 Recovering genetic information from wet specimens, particularly those initially fixed in formalin,  
99 is a new frontier in museum genomics. Here we present methods for extracting and sequencing  
100 the DNA of both a bacterial symbiont and its vertebrate host. Thus, we were able to test for  
101 evidence of co-diversification of host and its symbiont, and for patterns of symbiont diversity at  
102 the clade-level that correlate with biogeography, temperature, and time.  
103

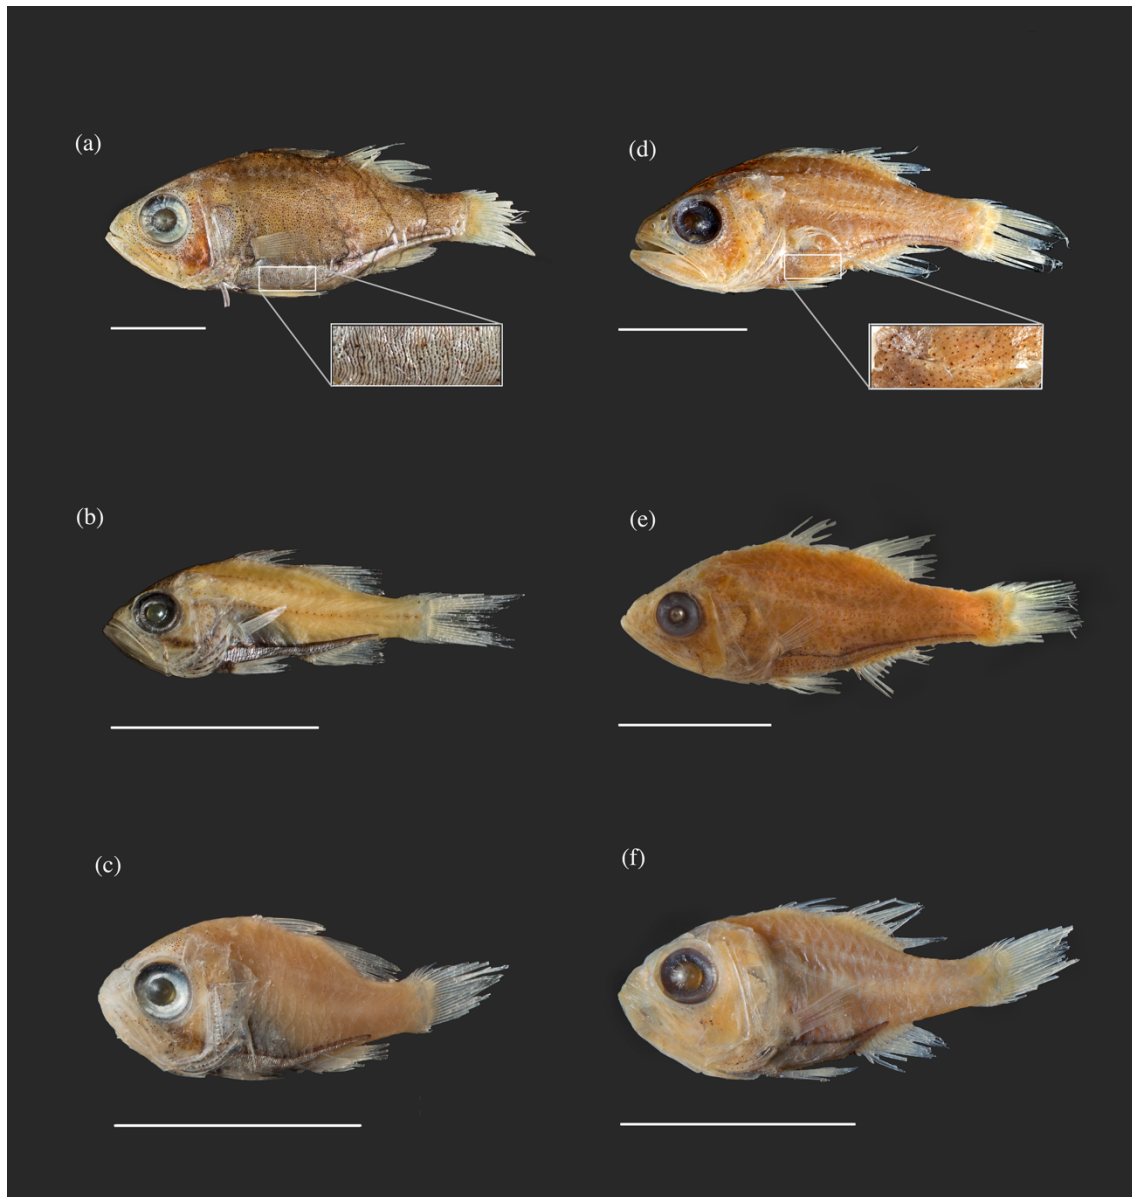

104

105 **Figure 2.** Photographs of select *Siphamia* specimens from lots used in this study. Specimens a-c represent the  
106 *tubifer* subgroup (Gon and Allen 2012), identified by the striated light organ (a) and specimens d-f represent the  
107 *tubulata* subgroup, identified by the spotted light organ (d). (a) *S. tubifer* (USNM341595) with insert of light organ  
108 detail showing striated morphology. (b) *S. stenotes* (USNM396981, paratype). (c) *S. jebbi* (CAS223855). (d) *S.*  
109 *tubulata* (CAS28515) with insert of light organ detail showing spotted morphology. (e) *S. corallicola* (USNM203781).  
110 (f) *S. brevilux* (CAS65338, paratype). Scale bars indicate 1 cm in length.

## 111 **Methods**

112

### 113 *Taxon sampling and DNA extraction.*

114

115 We sampled 59 specimens representing 14 *Siphamia* species obtained from the combined wet  
116 collections of the California Academy of Sciences, the Australian Museum, and the Smithsonian  
117 National Museum of Natural History (Figs. 1-2, Table 1). To extract DNA from these specimens,  
118 we adapted the following protocol from two previous methods designed for use with formalin-  
119 fixed tissues (Ruane and Austin 2017, Hykin *et al.*, 2015). Light organs were aseptically  
120 dissected and individually placed into 1 ml of GTE buffer and allowed to soak for three hours at  
121 room temperature. This step was repeated two times after which each light organ was  
122 transferred into a final 1 ml aliquot of fresh GTE buffer and left to soak overnight at room  
123 temperature. The following morning, each sample was transferred into 1 ml of 100% ethanol for  
124 one minute, followed by 1 ml of 70% ethanol for 5 minutes, and 1 ml of nuclease-free water for  
125 10 minutes at room temperature. Light organs were then transferred into 180 ul of pre-heated  
126 (98°C) ATL buffer (QIAGEN) and incubated at 98°C for 15 minutes, after which samples were  
127 immediately placed on ice for at least 2 minutes. Once cooled, 40 ul of proteinase K was added  
128 to each sample and the samples were incubated at 60°C for 48 hours on a shaking heat block.  
129 Samples were vortexed periodically and additional 20 ul aliquots of proteinase K were added as  
130 needed (up to 100 ul total). Following this incubation period, DNA was extracted using the  
131 QIAGEN DNEasy Blood and Tissue Kit as described by the manufacturer. Purified DNA  
132 products were eluted into 50 ul of nuclease-free water after a 3-minute incubation at 55°C.

133

### 134 *Library preparation and sequencing.*

135

136 Samples were quantified using the Qubit dsDNA HS Assay Kit on the Qubit 2.0 Fluorometer  
137 (Invitrogen) and profiled with an Agilent 2100 Bioanalyzer. Samples with a peak in size  
138 distribution greater than 300 bp were sonicated with a Qsonica (Q800R3) for one or two minutes  
139 (if peak was greater than 1,500 bp) with a pulse rate of 10-10 seconds and an amplitude of  
140 25%. Samples were then treated with the NEBNext© FFPE DNA Repair Mix following the  
141 manufacturer's instructions and DNA libraries were immediately prepped using the NEBNext©  
142 Ultra II DNA Library Prep Kit. Samples with low or undetectable quantities of dsDNA were re-  
143 quantified using the Qubit ssDNA HS Assay Kit and prepared using the Accel-NGS 1S Plus

144 DNA Library Kit (Swift Biosciences), which uses both single- and double-stranded DNA as  
145 templates. Each sample was uniquely indexed with the NEBNext® Multiplex Oligos for Illumina.  
146 Final libraries were cleaned with AMPure XP magnetic beads, pooled, and sequenced as  
147 single-end 150 bp (UC Berkeley, QB3) or paired-end 150 bp (NovoGene) reads on the Illumina  
148 HiSeq 4000 platform, or as paired-end 150 bp reads on the Illumina NovaSeq S4 platform  
149 (Genewiz). Table S1 contains details for each sample and library preparation.

150

### 151 *Sequence analysis.*

152

153 Sequences were demultiplexed, trimmed and quality filtered for a Phred score of 20 or above  
154 using Trimmomatic (Bolger *et al.*, 2014). The remaining reads were aligned to the reference  
155 genome of *Photobacterium mandapamensis*, isolated from the light organ of *Siphamia tubifer*  
156 (Urbanczyk *et al.*, 2011) with BWA-MEM (Li 2013). Unaligned sequences were then processed  
157 with MitoFinder (Allio *et al.*, 2020) using the reference mitochondrial genome of the Banggai  
158 cardinalfish *Pterapogon kauderni* (Matias and Hereward 2018). All cardinalfish cytochrome  
159 oxidase subunit 1 (*COI*) gene sequences that were recovered aligned using MUSCLE (Edgar  
160 2004) and a maximum likelihood analysis was carried out with raxml-ng (Kozlov *et al.*, 2019)  
161 using the evolutionary model TIM2+F+I+G4 which had the lowest BIC score as predicted by  
162 IQtree (Nguyen *et al.*, 2015) and 1,000 bootstraps to infer the phylogenetic relationships  
163 between host species. *COI* sequences of *Siphamia* spp. from previous studies were also  
164 included in the analysis (Table S2). An additional phylogeny was inferred from a supermatrix of  
165 15 mitochondrial genes (*ATP6*, *ATP8*, *COX1*, *COX2*, *COX3*, *CYTB*, *ND1*, *ND2*, *ND3*, *ND4*,  
166 *ND4L*, *ND5*, *ND6*, *16S*, *18S*) identified by MitoFinder that were present in at least 70% of the  
167 individuals included in the analysis using the SuperCRUNCH python toolkit (Portik and Wiens  
168 2020). The concatenated supermatrix alignment was used in a maximum likelihood analysis by  
169 raxml-ng with 500 bootstrap replicates and the evolutionary model TIM2+F+R4 as predicted by  
170 IQtree to infer the phylogenetic relationships between species.

171

172 Two approaches were used to determine the identity of the light organ symbionts. First, 16S  
173 rRNA gene sequences were extracted from each data set by aligning all light organ sequences  
174 to the complete 16S sequence of a free-living strain of *Photobacterium leiognathi* (AY292917)(  
175 Nishiguchi and Nair 2003) with BWA-MEM (Li 2013). A sequence similarity search was then  
176 performed with the basic local alignment search tool (BLAST) (Altschul *et al.*, 1990) against  
177 NCBI's microbial database to identify the known sequence with the lowest E-value and highest



178 percent identity. Second, the average nucleotide identity (ANI) of each sample was calculated  
179 relative to several *Photobacterium* species for which entire genome sequences are available  
180 from the NCBI genome database (*P. kishintanii* pjapo1.1 - NZ\_PYNK000000000; *P. leiognathi*  
181 Iriyu4.1 - NZ\_BANQ000000000; *P. mandapamensis* ajapo4.1 - NZ\_PYNQ010000000; *P.*  
182 *mandapamensis* gjord1.1 - NZ\_PYNP000000000; *P. mandapamensis* svers1.1 -  
183 NZ\_PYNT000000000) with the program fastANI (Jain *et al.*, 2018).

184  
185 To infer the phylogenetic relationships between symbionts from different hosts, all sequences  
186 that aligned to the reference genome of *P. mandapamensis* (Urbanczyk *et al.*, 2011) were also  
187 analyzed for sequence variation between with the program snippy (Seemann 2015), requiring a  
188 minimum depth of 10x and a minimum percent of reads to be 90% to call a variant. A sequence  
189 alignment based on a core set of single nucleotide polymorphisms (SNPs) was then created  
190 across symbionts with enough genome coverage to produce a core set of at least 1,000 SNPs  
191 and including two additional reference genomes of *P. mandapamensis* representing both Clade  
192 I (ajapo4.1) and Clade II (Res4.1). The phylogenetic relationships of these bacteria were then  
193 inferred with raxml-ng (Kozlov *et al.*, 2019) using the evolutionary model model TVM+F+R3,  
194 which had the lowest *BIC* score as predicted by IQtree (Nguyen *et al.*, 2015) and 1,500  
195 bootstrap replicates.

196  
197 Samples included in both the host and symbiont phylogenies were then compared and tested  
198 for co-divergence using the cospeciation function in the R phytools package (Revell 2012).  
199 SNPs were annotated with the program SNPeff (Cingolani *et al.*, 2012). Pairwise phylogenetic  
200 (patristic) distances between symbionts were calculated with the adephylo package (Jombart  
201 and Dray 2008) in R, and pairwise geographic distances were calculated based on each  
202 specimen's latitude and longitude using the R package geodist (Padgham and Summer 2020).  
203 Tests for correlations between the phylogenetic distances for each pair of symbionts and their  
204 geographic distance or difference between sampling years were carried out, and P values were  
205 adjusted for multiple comparisons with the Holm method in R.

206

207

## 208 **Results**

209

210 *DNA recovery*

211



212 Variable amounts of total DNA were recovered from the light organs of preserved *Siphamia*  
213 specimens, ranging from undetectable levels (<2 ng) to more than 1,500 ng, and there was no  
214 correlation between DNA yield and specimen size (Spearman's rank correlation:  $\rho=0.52$ ,  
215  $P=0.09$ ). Despite this variability in yield, quality DNA sequences were recovered from several  
216 specimens with undetectable levels of starting DNA. In fact, some samples with undetectable  
217 levels of input DNA resulted in >90% coverage of the symbiont genome at 10x depth. Of note,  
218 many of those sequence libraries were prepared using the Swift Bioscience Accel-NGS 1S Plus  
219 DNA Library Kit which uses both double and single stranded DNA as starting template (Table  
220 S1).

221

### 222 *Host phylogeny*

223

224 Host *COI* sequences were recovered from 32 samples and analyzed with an additional 12  
225 *Siphamia COI* sequences from previous studies (Table S2) to generate a maximum likelihood  
226 phylogeny of 17 *Siphamia* species (Fig 3). The supermatrix of 15 mitochondrial genes from 27  
227 *Siphamia* specimens representing 11 species resulted in a phylogenetic tree with similar, but  
228 not identical, topology and stronger bootstrap support at the nodes (Figure S1).

229

230 Our phylogenetic hypothesis for *Siphamia* is very similar to that proposed by Gon and Allen  
231 (2012) using morphological characters, with slight variations in the placement of specific taxa.  
232 Our tree contains a clade that corresponds to Gon and Allen's *S. tubifer* species group,  
233 characterized by a striated pattern on the light organ (Fig 2), although 1 individual *S. majimai*  
234 and 2 *S. jebbi* specimens fell out of this group (Fig 3). Within this group, our trees support the  
235 relationships of *S. jebbi* and *S. stenotes* as sister species, as well as *S. tubifer* and *S. fraseri*.  
236 The relative placement of *S. mossambica*, *S. majimai*, and *S. goreni* varies among the trees, but  
237 there is support for *S. mossambica* and *S. goreni* as sister species in the *COI* tree, *S.*  
238 *mossambica* and *S. majimai* as sisters in the supermatrix tree, and *S. majimai* and *S. goreni* as  
239 sisters in the morphological tree (Gon and Allen 2012). As such, it is likely that all of three of  
240 these species belong to one clade. The relationships among the species outside of the *S. tubifer*  
241 group are less certain, with several species clustering into species complexes. However, *S.*  
242 *roseigaster*, *S. cuneiceps*, and *S. cephalotes* consistently fall out near the base of the tree,  
243 indicating that these species diverged earlier.

244

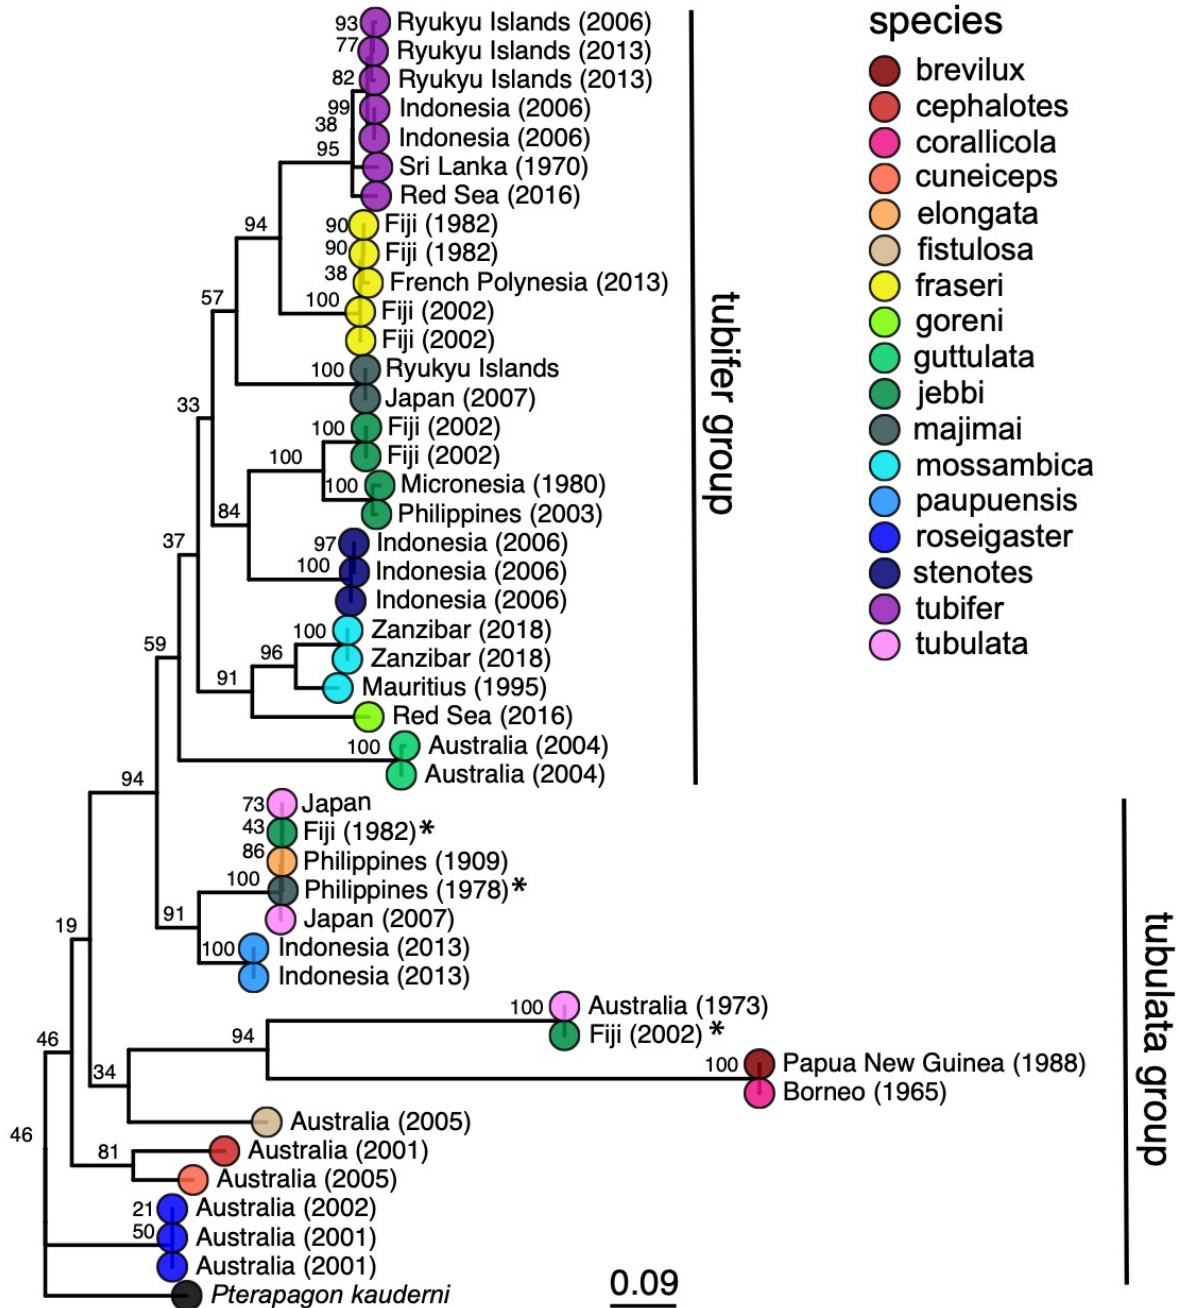

245

246 **Figure 3.** Maximum likelihood phylogeny of *Siphamia* based on *COI* gene sequences. Species identities are  
 247 indicated by the branch tip colors and the sampling location and year of each specimen is listed in the branch label.  
 248 Bootstrap support values are indicated at each node. The Banggai cardinalfish, *Pterapogon kauderni*, was used as  
 249 the outgroup. The *tubifer* and *tubulata* subgroups within *Siphamia* (Gon & Allen 2012) are highlighted with vertical  
 250 lines to the right of the tree. Specimens that fall outside of their designated subgroup based on species identities are  
 251 indicated with an \*.

252

253

254

255

256 *Symbiont identification and phylogeny*

257

258 To identify the light organ symbionts of the *Siphamia* hosts, we recovered 16S rRNA sequences  
259 from the shotgun sequence data. 93% of all samples had >95% coverage of the 16S rRNA  
260 gene at 10x read depth. Samples were putatively identified by matching sequences against  
261 those in the NCBI database and 67% had *P. mandapamensis* as their top hit (Table S3.). All  
262 other symbionts were identified as *P. leiognathi*. However, previous analyses of 16S rRNA gene  
263 sequences could not resolve *P. leiognathi* from *P. mandapamensis* (Ast and Dunlap 2004,  
264 Wada *et al.*, 2006). Therefore, to confirm the identities of the light organ symbionts, we also  
265 calculated the average nucleotide identity (ANI) of each symbiont relative to several  
266 *Photobacterium* strains for which whole genomes are available. 86% of the symbionts examined  
267 had ANI values of 95% or greater relative to *P. mandapamensis* strains in Clade II (gjord1.1 and  
268 svers1.1) (Table 2), which is the recommended value to delimit bacterial species (Goris *et al.*,  
269 2007). All remaining samples also had the highest ANI values relative to *P. mandapamensis*  
270 Clade II, with the exception of one sample (AMI18740-066), which was most similar to *P.*  
271 *mandapamensis* Clade I, however many of these samples also had low genome coverage  
272 (Table S1). None of the symbionts had ANI values relative to *P. leiognathi* that were higher than  
273 those relative to *P. mandapamensis*.

274

275 Single nucleotide polymorphisms (SNPs) were detected for the light organ symbionts from most  
276 of the specimens sampled, but this number varied greatly and correlated with the variability in  
277 genome coverage (Spearman's rank correlation:  $\rho=0.84$ ,  $P<0.001$ , Table S1). Samples with  
278 greater than 50% symbiont genome coverage at 10x read depth had an average of 23,221  
279 SNPs relative to the reference genome of *P. mandapamensis* (Urbanczyk *et al.*, 2011). A core  
280 set of 1,471 SNPs were identified across 32 specimens that represent 11 *Siphamia* host  
281 species and included reference genomes from both Clade I and Clade II of *Photobacterium*  
282 *mandapamensis*. 68% of these SNPs were synonymous, and the remaining non-synonymous  
283 SNPs were found in 288 distinct genes. None of the core SNPs were located in the *lux* operon,  
284 composed of the genes responsible for light production. However, two non-synonymous SNPs  
285 were detected in the *rpoN* gene, which is known to play a role in biofilm formation,  
286 bioluminescence, and symbiosis initiation for *Aliivibrio fischeri* (Wolfe *et al.*, 2004), the luminous  
287 symbiont of many squid and other fish species. No other SNPs were detected in genes

288 of known function for the bioluminescent symbiosis between *A. fischeri* and the squid host  
289 *Euprymna scolopes* (Norsworthy and Visick 2013).

290  
291 A maximum likelihood phylogeny was inferred for the bacterial symbionts using full sequence  
292 alignments that included the core set of SNPs described above. This analysis confirmed that all  
293 *Siphamia* light organ symbionts examined belong to Clade II of *P. mandapamensis* and that the  
294 reference strain of *P. mandapamensis* representing Clade I (ajapo4.1) was a clear outgroup (Fig  
295 4). The majority of symbionts analyzed were closely related to the reference strain svers1.1 of  
296 *P. mandapamensis*, although several symbionts fell out in a group with *P. mandapamensis*  
297 strain Res 4.1, both of which are members of Clade II. There were three additional symbionts,  
298 all from different host species, that did not belong to either of these subgroups, but are still  
299 clearly members of Clade II.

300  
301 No clear patterns of symbiont divergence that corresponded with host species, geography, or  
302 time emerged. There was no correlation between symbiont phylogenetic distance and  
303 geographic distance (Spearman's rank correlation:  $\rho=-0.013$ ,  $P_{\text{corr}}=1$ ) and there was a slightly  
304 negative correlation between phylogenetic distance and time in years (Spearman's rank  
305 correlation:  $\rho=-0.17$ ,  $P_{\text{corr}}=0.006$ ). In fact, the oldest specimen for which informative sequence  
306 data was retained was collected in 1931 and it had luminous bacteria in its light organ that was  
307 highly similar to symbionts from specimens collected more than eighty years later. Similarly,  
308 *Siphamia* specimens collected from locations in the western Indian Ocean had symbionts that  
309 were closely related to those from locations as far east as Fiji and even French Polynesia. With  
310 respect to *S. tubifer*, which has the broadest geographic distribution of all *Siphamia* species, the  
311 symbionts of all ten specimens included in the symbiont phylogeny fell out in Clade II of *P.*  
312 *mandapamensis* and showed no pattern of strain diversity by geography, confirming the high  
313 degree of specificity of this association, even across a broad geographic range.

314  
315 The bacterial symbionts from four distinct host species had notably longer branches than the  
316 others, two of which were closely related to reference strain Res 4.1 (NZ\_PYNS00000000), an  
317 isolate from the light organ of *S. tubifer* collected in Okinawa, Japan in 2014. Corresponding  
318 with longer branch lengths, these four symbionts had more than 3 times as many SNPs than  
319 any other sample, ranging between 66,583 and 72,219 SNPs (Table S1). Interestingly, these  
320 four specimens were collected from two locations, Sydney, Australia and Kochi, Japan, which  
321 had the lowest minimum annual temperatures of all collection sites in this study (Table 1).

322 Furthermore, there were 20,082 SNPs in common among these samples that were not present  
323 in the core set of SNPs identified across all samples.  
324

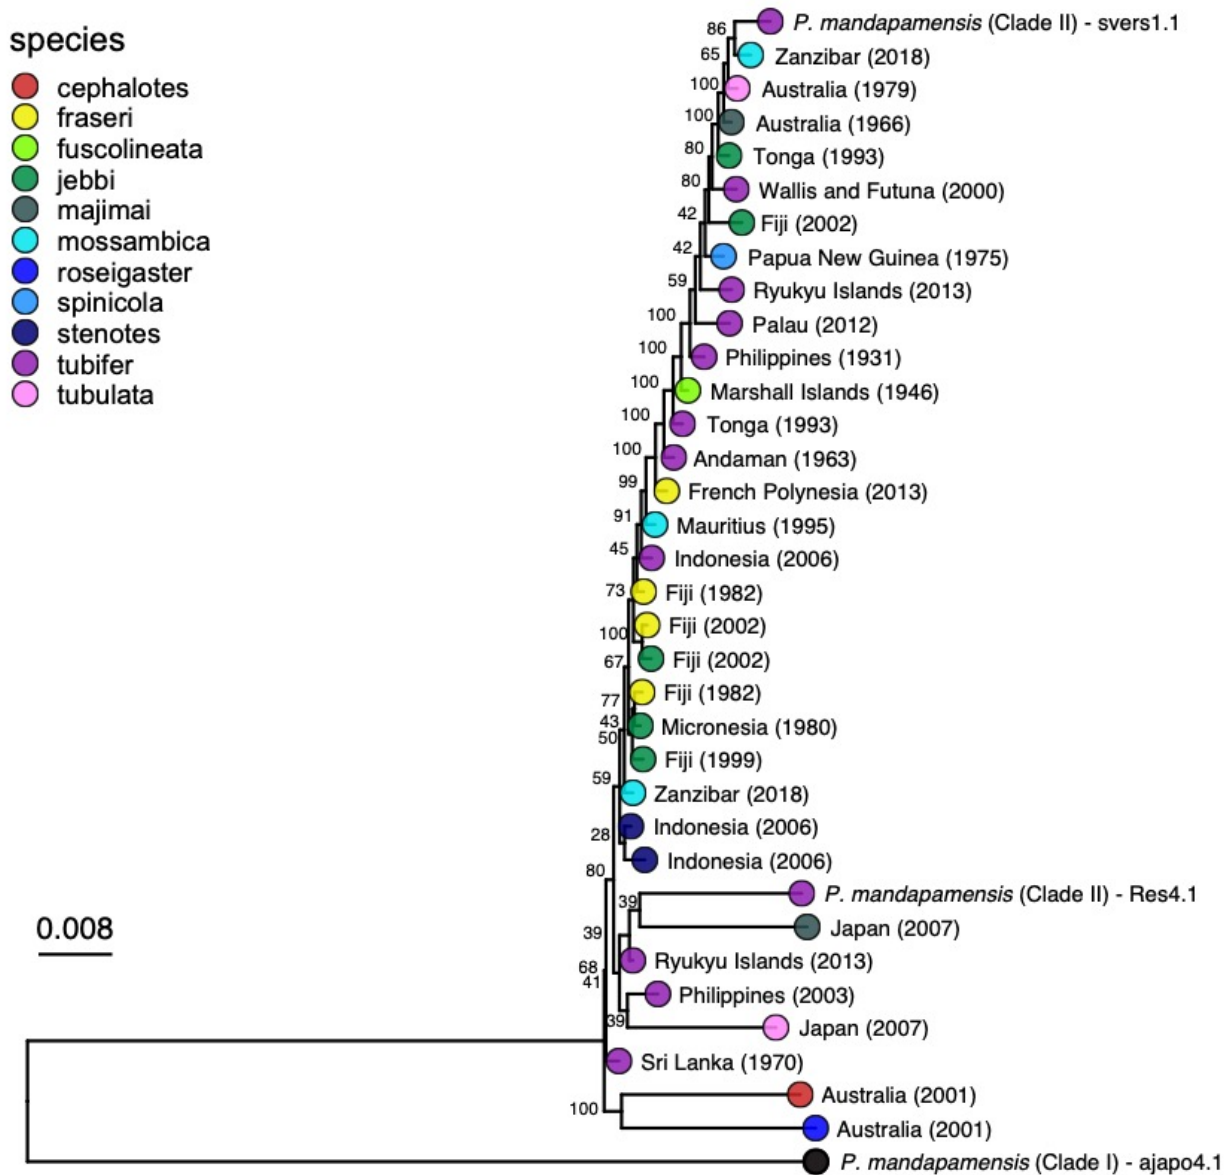

325  
326 **Figure 4.** Maximum likelihood phylogeny of the light organ symbionts of various *Siphamia* species constructed from a  
327 core set of 1,471 single nucleotide polymorphisms. Corresponding host species are indicated by the branch tip colors  
328 and the sampling location and year of each specimen is listed in the branch label. Bootstrap support values are  
329 indicated at each node.

330  
331 *Analysis of co-divergence.*

332  
333 Twenty specimens had informative sequence information for both the host and symbiont, and  
334 thus, we were able to carry out an analysis of co-divergence based on the host *COI* phylogeny



335 and corresponding symbiont phylogeny for these individuals. This analysis revealed no  
336 evidence of co-divergence of *Siphamia* hosts and their light organ symbionts ( $P=0.13$ ) as seen  
337 in Figure 5. However, *S. roseigaster* and *S. cephalotes* fall out as sister lineages relative to the  
338 rest of *Siphamia*, and their symbionts follow a similar pattern, forming a sister clade to the rest  
339 of *P. mandapamensis* Clade II.

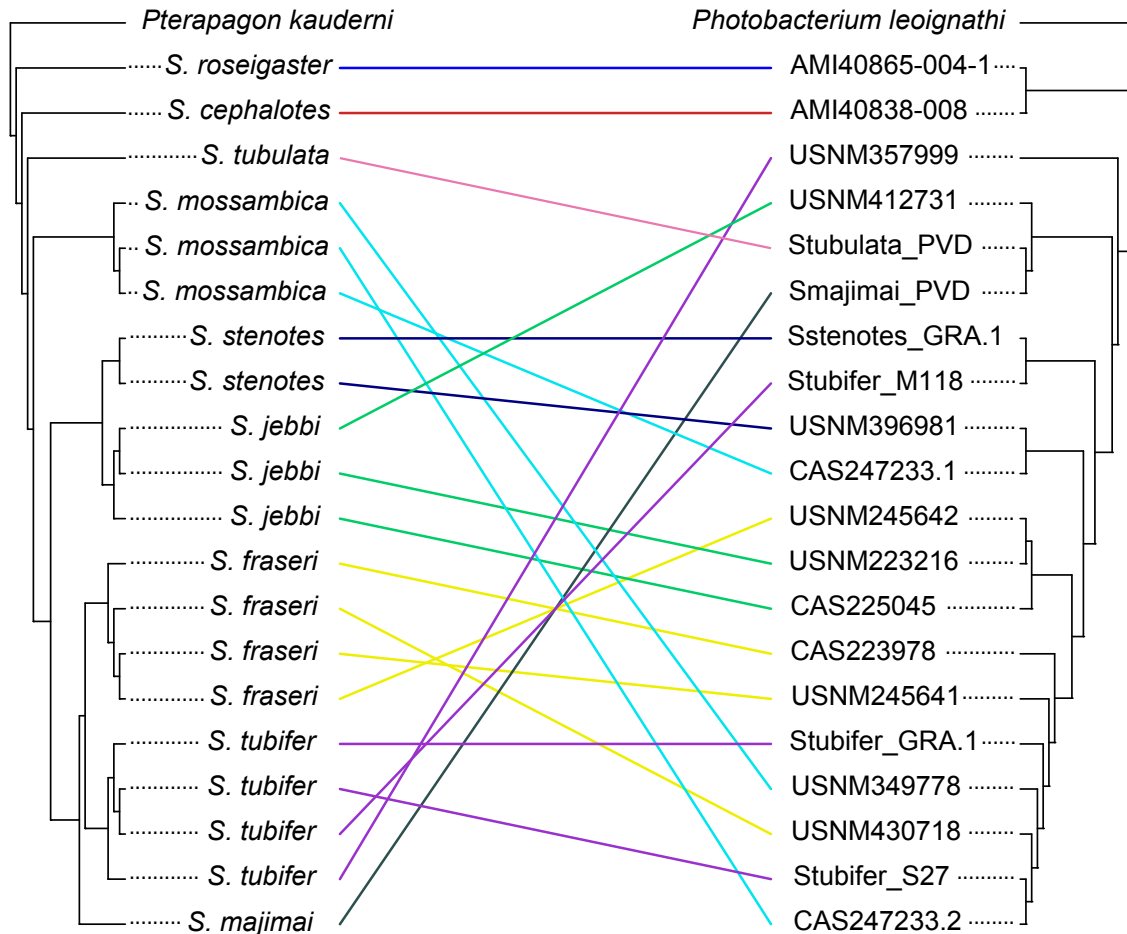

340

341 **Figure 5.** Analysis of the phylogenetic relationships of *Siphamia* hosts (left)  
342 revealed no evidence of co-divergence. The host cladogram is based on *COI* gene sequences and the symbiont  
343 cladogram is based on a core set of 1,471 single nucleotide polymorphisms. Linkages between individual hosts and  
344 their symbionts are shown and colored according to host species.

345

346

## 347 Discussion

348

349 Our results indicate that the symbiosis between cardinalfishes in the genus *Siphamia* and the  
350 luminous bacterium *Photobacterium mandapamensis* is highly conserved across host species,

351 over geographic space, and through time. All light organ symbionts examined were identified as  
352 strains belonging to Clade II of *P. mandapamensis* (Kaeding *et al.*, 2007). This high subspecies  
353 level of specificity is surprising given the facultative symbiotic life history of the bacterium and  
354 the broad geographic and temporal ranges examined. Such a high degree of specificity is  
355 expected for vertically transmitted symbioses in which a host directly transfers its symbiotic  
356 bacteria to its offspring (Moran 2006). For environmentally transmitted symbioses where the  
357 specific association must be re-established by each new host generation, we expected a lower  
358 degree of specificity, similar to what has been documented for most other symbiotically  
359 luminous fishes such as the leiognathid fishes (Kaeding *et al.*, 2007). Thus, the highly  
360 conserved relationship between *Siphamia* hosts and *P. mandapamensis* (Clade II) indicates  
361 there may be unique mechanisms in the host and/or symbiont that contribute to maintaining the  
362 specificity of the association.

363

364 *Siphamia tubifer* larvae only take up symbionts in the pelagic phase, when their light organ  
365 becomes receptive to colonization (Dunlap *et al.*, 2012). Yet, *Photobacterium* spp. normally  
366 occurs in relatively low concentrations in the pelagic environment (Trousselier *et al.*, 2017), and  
367 even more so at the sub-species level. For the larval host to rely on this improbable encounter  
368 in the open water would be considered a very risky strategy. However, it has been shown that  
369 established populations of *S. tubifer* hosts regularly excrete their luminous symbiont with fecal  
370 waste (Dunlap & Nakamura 2011), thereby enriching its population in the immediate  
371 environment. Indeed, a previous study of *S. tubifer* symbiont genomics revealed fine-scale  
372 population structure of *P. mandapamensis* among geographic locations, indicating that symbiont  
373 populations are heavily influenced by their local hosts (Gould and Dunlap 2019). Therefore, this  
374 local enrichment may be a key mechanism/factor in mitigating the risk of relying on  
375 environmental transmission in the *Siphamia*-symbiont dependency, and for *Siphamia* hosts,  
376 ensures that *P. mandapamensis* (Clade II) will be readily available to new recruits anywhere  
377 that adult *Siphamia* already occur.

378

379 The apparent preference to associate with *P. mandapamensis* Clade II over strains in Clade I  
380 also suggests that there are critical strain level differences between members of these clades  
381 that may be of consequence to the host. However, most studies of microbial symbioses  
382 overlook symbiont strain-level variation, even though this variation can have important impacts  
383 on a host, and merits further investigation. For example, in *A. fischeri*, the primary symbiont for  
384 most *Euprymna* squid species, patterns of strain variation have been observed within and



385 between host populations (Jones *et al.*, 2006, Wollenberg and Ruby 2009), and can have  
386 different colonization efficiencies (Lee and Ruby 1994, Bongrand *et al.*, 2016), mechanisms of  
387 biofilm formation during host colonization (Rotman *et al.*, 2019), and may have variable fitness  
388 consequences to their host (Koch *et al.*, 2014). In this study we were able to characterize strain  
389 variation in *P. mandapamensis* associated with various *Siphamia* hosts. There was no distinct  
390 correlation between symbiont strain and host species with respect to time or geography,  
391 although we did observe some strain divergence associated with colder temperatures. Four of  
392 the *Siphamia* specimens examined had more than three times as many symbiont SNPs as the  
393 others. Interestingly, these four individuals were all collected from more temperate regions in  
394 Japan and Australia with the lowest minimum annual temperatures of all locations in this study  
395 (Table 1). Temperature is a driving factor of the distribution of bacteria in the marine  
396 environment (Sul *et al* 2013), and has been shown to affect the distribution of the luminous  
397 vibrio symbionts of sepiolid squid (Nishiguchi 2000) and to regulate the symbiotic associations  
398 of other marine taxa, such as cnidarians (Herrera *et al* 2020). Thus, the symbionts associated  
399 with these four specimens might have some genetic adaptations to slightly cooler temperatures.  
400 Future studies investigating the influence of temperature on strain diversity and host  
401 colonization efficiency would help to elucidate the role that temperature might play in the  
402 *Siphamia-Photobacterium mandapamensis* symbiosis.

403  
404 Our primary objective of this study was to sequence the symbionts found in the light organs of  
405 various *Siphamia* species, but we were able to recover enough host sequence data to also  
406 construct a reasonably well-supported host phylogeny. This allowed us to examine co-  
407 diversification of hosts and their microbial symbionts. Although we found no evidence of co-  
408 diversification, the high degree of specificity maintained for this symbiosis across host species  
409 through time and space suggests that this association is genetically constrained by the host.  
410 This host-mediated selection poses the question of whether *P. mandapamensis* (Clade II)  
411 provides a fitness advantage to the host compared to other bacteria moving through the gut of  
412 *Siphamia*, including other luminous bacteria. It should also be noted that a lack of co-  
413 diversification does not preclude a history of co-evolution of host and symbiont in the system  
414 (Moran 2006) and members of Clade II of *P. mandapamensis* are likely have specific  
415 adaptations that provide them with a fitness advantage inside the light organ environment of  
416 *Siphamia* fishes.

417

418 *Siphamia*, the only symbiotically luminous genus of cardinalfish, is monophyletic and divergent  
419 from the rest of the Apogonidae (Thacker and Roje 2009). The absence of this symbiosis in all  
420 other cardinalfish genera, including the other bioluminescent genera, brings up intriguing  
421 questions regarding the role of the symbiosis in the evolution of the *Siphamia* genus, specifically  
422 whether this association is a form of speciation by symbiosis (Wallin 1927), endowing *Siphamia*  
423 species with a key innovation that helped them persist and perhaps even proliferate. Parallel  
424 examples have been documented in damselfishes' (Pomacentridae) mutualism with sea  
425 anemones, proposed to be the key innovation leading to the radiation of anemonefishes  
426 (Amphiprioninae; Litsios et al., 2012). Similarly, symbiosis with zooxanthellae may be a key  
427 attribute in enhancing adaptive radiation for the heterobranch genus *Phyllodesmium* (Wagele  
428 2004). In *Siphamia*, there seems to be a rigorous mechanism of maintaining symbiont specificity  
429 across the host genus, presumably driven by the host. Therefore, understanding the genetic  
430 architecture of the *Siphamia* symbiont selection mechanism may be key to deciphering the  
431 highly specific nature of the association.

432  
433 We also highlight the potential for formalin-fixed, fluid-preserved museum specimens to be used  
434 to study microbial symbioses. Adapting recently developed molecular techniques to extract and  
435 prepare DNA from these specimens for sequencing, including the use of single-stranded DNA  
436 as templates to construct sequence libraries, we recovered informative sequence data for both  
437 the host and its bacterial symbiont. This process allowed us to identify and compare strain level  
438 differences between the bacterial symbionts of many host species collected over nearly a  
439 century throughout the Indo-Pacific. We saw no clear correlation between sequence quality or  
440 yield and variables such as specimen age, size, or DNA input. It is likely that the observed  
441 variability between samples is largely due to the initial preservation method and long-term  
442 storage conditions of the specimens. For example, the quality (buffered or unbuffered) and  
443 concentration of the formalin solution used to initially fix a specimen can have variable effects  
444 on DNA quality (Hykin *et al.*, 2015), as can the length of time a specimen remained in formalin  
445 before being transferred to its long-term storage solution. Unfortunately, many specimen  
446 records lack such information. Moving forward, it would be beneficial for researchers to have  
447 access to such information for specimens archived in natural history museums. Nevertheless,  
448 with the advancement of new genomic techniques and sequencing technologies, the ability to  
449 retrieve informative genetic information for both a host animal and its symbiotic bacteria from  
450 museum specimens will continue to advance our understanding of these critical associations.

451

452 **Tables**

453

454 Table 1. Information for the *Siphamia* specimens sampled in this study. Listed are each specimen's  
 455 catalog number or unique identifier, species identification, sampling location and year, the minimum and  
 456 maximum temperatures at that location, and the standard length of the individual sampled. Specimens  
 457 with decimals after their catalog number or unique identifier indicate that more than one individual was  
 458 sampled from the same specimen lot. Sea surface temperatures from the topmost meter of water at the  
 459 geographical point of specimen collection were calculated as the temporal minimum and maximum from  
 460 monthly climatologies (2002-2009) extracted from the Aqua-MODIS database available on Bio-ORACLE.  
 461 (Tyberghein *et al.*, 2012)

| Specimen ID    | Species     | Location    | Year | Min Temp | Max Temp | Length (cm) |
|----------------|-------------|-------------|------|----------|----------|-------------|
| AMI18353-041   | jebbi       | Fiji        | 1974 | 31.06    | 25.57    | 1.69        |
| AMI18740-066   | jebbi       | Australia   | 1975 | 29.48    | 24.69    | 1.46        |
| AMI19450-018.1 | tubifer     | Australia   | 1975 | 29.94    | 24.09    | 2.94        |
| AMI19450-018.2 | tubifer     | Australia   | 1975 | 29.94    | 24.09    | 3.62        |
| AMI20353-001   | majimai     | Australia   | 1972 | 31.76    | 22.61    | 1.67        |
| AMI20753-031   | tubulata    | Australia   | 1979 | 30.04    | 23.54    | 2.56        |
| AMI33715-016   | jebbi       | Australia   | 1993 | 29.70    | 25.08    | 1.46        |
| AMI37933-007   | tubifer     | Vanuatu     | 1997 | 30.18    | 27.30    | 2.19        |
| AMI40838-008   | cephalotes  | Australia   | 2001 | 23.03    | 15.49    | 3.07        |
| AMI40865-004.1 | roseigaster | Australia   | 2001 | 24.16    | 18.64    | 4.56        |
| AMI40865-004.2 | roseigaster | Australia   | 2001 | 24.16    | 18.64    | 4.55        |
| AMIB4208       | majimai     | Australia   | 1958 | 28.11    | 21.64    | 2.31        |
| AMIB4247       | tubifer     | Vanuatu     | 1959 | 29.64    | 26.23    | 2.01        |
| CAS247233.1    | mossambica  | Zanzibar    | 2018 | 31.06    | 25.92    | 2.55        |
| CAS247233.2    | mossambica  | Zanzibar    | 2018 | 31.06    | 25.92    | 2.92        |
| CAS222309      | jebbi       | Fiji        | 2002 | 30.28    | 26.16    | -           |
| CAS223855      | jebbi       | Fiji        | 2002 | 29.88    | 25.89    | -           |
| CAS223939.1    | jebbi       | Fiji        | 2002 | 29.88    | 25.89    | 2.35        |
| CAS223939.2    | jebbi       | Fiji        | 2002 | 29.88    | 25.89    | 1.81        |
| CAS223978.1    | unknown     | Fiji        | 2002 | 29.88    | 25.89    | 3.68        |
| CAS223978.2    | unknown     | Fiji        | 2002 | 29.88    | 25.89    | 4.05        |
| CAS223979.1    | fraseri     | Fiji        | 2002 | 29.88    | 25.89    | 2.8         |
| CAS223979.2    | fraseri     | Fiji        | 2002 | 29.88    | 25.89    | 3.04        |
| CAS225045      | jebbi       | Fiji        | 1999 | 29.88    | 25.89    | -           |
| CAS27441       | tubifer     | Philippines | 1931 | 30.77    | 27.89    | 3.26        |
| CAS28515       | tubulata    | Australia   | 1973 | 30.31    | 23.60    | -           |

|                 |              |                   |      |       |       |      |
|-----------------|--------------|-------------------|------|-------|-------|------|
| CAS84356        | tubifer      | Palau             | 2012 | 30.33 | 28.57 | 1.9  |
| Stubifer_M118   | tubifer      | Ryukyu Islands    | 2013 | 29.60 | 20.83 | 1.3  |
| Smajimai_PVD    | majimai      | Japan             | 2007 | 28.75 | 18.68 | 2.61 |
| Stubulata_PVD   | tubulata     | Japan             | 2007 | 28.28 | 18.02 | 2.12 |
| Stubifer_S27    | tubifer      | Ryukyu Islands    | 2013 | 29.60 | 20.83 | 2.65 |
| Sstenotes_GRA.1 | stenotes     | Indonesia         | 2006 | 30.80 | 26.42 | 1.89 |
| Sstenotes_GRA.2 | stenotes     | Indonesia         | 2006 | 30.80 | 26.42 | 1.98 |
| Stubifer_GRA.1  | tubifer      | Indonesia         | 2006 | 30.88 | 26.60 | 2.39 |
| Stubifer_GRA.2  | tubifer      | Indonesia         | 2006 | 30.88 | 26.60 | 2.85 |
| USNM112099      | elongata     | Philippines       | 1909 | 30.74 | 27.58 | 3.46 |
| USNM142281.1    | fuscolineata | Marshall Islands  | 1946 | 29.70 | 27.05 | 2.2  |
| USNM142281.2    | fuscolineata | Marshall Islands  | 1946 | 29.70 | 27.05 | 2.76 |
| USNM203781      | corallicola  | Borneo            | 1965 | 31.33 | 28.34 | 2.58 |
| USNM223216      | jebbi        | Micronesia        | 1980 | 30.73 | 28.31 | 1.74 |
| USNM245638      | jebbi        | Fiji              | 1982 | 29.10 | 25.04 | 2.07 |
| USNM245641      | fraseri      | Fiji              | 1982 | 28.60 | 24.12 | 4.13 |
| USNM245642      | fraseri      | Fiji              | 1982 | 28.08 | 23.32 | 3.65 |
| USNM298542      | brevilux     | Papua New Guinea  | 1988 | 30.83 | 28.73 | 2.24 |
| USNM341594      | jebbi        | Tonga             | 1993 | 29.02 | 25.28 | 1.91 |
| USNM341595      | tubifer      | Tonga             | 1993 | 29.59 | 25.63 | 3.87 |
| USNM349778      | mossambica   | Mauritius         | 1995 | 28.76 | 23.68 | 2.36 |
| USNM357884      | tubifer      | Philippines       | 1980 | 30.60 | 27.53 | 3.68 |
| USNM357889      | spinicola    | Papua New Guinea  | 1975 | 29.83 | 25.76 | 3.11 |
| USNM357892      | tubifer      | Red Sea           | 1969 | 28.10 | 21.47 | 3.35 |
| USNM357897      | tubifer      | Andaman           | 1963 | 31.15 | 27.89 | 4.09 |
| USNM357999      | tubifer      | Sri Lanka         | 1970 | 30.58 | 27.33 | 2.94 |
| USNM358001      | majimai      | Philippines       | 1978 | 30.06 | 27.19 | 2.1  |
| USNM374480      | majimai      | Australia         | 1966 | 27.85 | 21.93 | 1.97 |
| USNM374837      | unknown      | Wallis and Futuna | 2000 | 30.27 | 28.26 | 1.96 |
| USNM396981      | stenotes     | Indonesia         | 2006 | 31.57 | 27.68 | 1.89 |
| USNM412731      | jebbi        | Philippines       | 2003 | 30.79 | 28.54 | 1.73 |
| USNM430718      | fraseri      | French Polynesia  | 2013 | 27.80 | 23.49 | 3.34 |

463 Table 2. Average nucleotide identities (%) of the light organ symbionts of the *Siphamia* specimens  
 464 sampled in this study relative to several *Photobacterium* species for which entire genomes are available  
 465 from NCBI: *P. kishitanii* (pjapo1.1), *P. leiognathi* (Irvu4.1), *P. mandapamensis*, Clade I (ajapo4.1), *P.*  
 466 *mandapamensis*, Clade II (gjord1.1, svers1.1). Values in bold are 94.5% or greater. Also listed is each  
 467 specimen's catalog number or unique identifier and the symbiont's percent genome coverage at 10x  
 468 sequencing depth relative to *P. mandapamensis* (svers1.1)  
 469

| Specimen ID     | <i>pjapo1.1</i> | <i>Irvu4.1</i> | <i>ajapo4.1</i> | <i>gjord1.1</i> | <i>svers1.1</i> | %10x |
|-----------------|-----------------|----------------|-----------------|-----------------|-----------------|------|
| Stubulata_PVD   | 80.1            | 92.9           | <b>96.7</b>     | <b>97.4</b>     | <b>97.4</b>     | 95.1 |
| Smajimai_PVD    | 80.1            | 92.8           | <b>96.7</b>     | <b>97.4</b>     | <b>97.3</b>     | 94.8 |
| AMI40838-008    | 80.2            | 92.8           | <b>96.5</b>     | <b>97.2</b>     | <b>97.1</b>     | 92.3 |
| AMI40865-004.1  | 80.1            | 92.9           | <b>96.5</b>     | <b>97.1</b>     | <b>97.2</b>     | 93.4 |
| Stubifer_GRA.2  | 79.8            | 92.2           | <b>96</b>       | <b>96.8</b>     | <b>97.2</b>     | 52   |
| CAS84356        | 80              | 92.1           | <b>96</b>       | <b>96.6</b>     | <b>97.1</b>     | 64.8 |
| CAS247233.1     | 80              | 92             | <b>95.8</b>     | <b>96.6</b>     | <b>97</b>       | 76.9 |
| Stubifer_S27    | 80              | 92.1           | <b>95.7</b>     | <b>96.5</b>     | <b>96.9</b>     | 88.9 |
| USNM412731      | 80.2            | 91.9           | <b>95.6</b>     | <b>96.3</b>     | <b>96.4</b>     | 95.9 |
| CAS27441        | 80              | 91.8           | <b>95.5</b>     | <b>96.2</b>     | <b>96.6</b>     | 95.3 |
| AMI40865-004.2  | 79.7            | 92             | <b>95.7</b>     | <b>96</b>       | <b>96.2</b>     | 5.9  |
| Sstenotes_GRA.1 | 80.1            | 91.8           | <b>95.4</b>     | <b>96.1</b>     | <b>96.2</b>     | 95.8 |
| Sstenotes_GRA.2 | 79.6            | 91.6           | <b>95.2</b>     | <b>95.9</b>     | <b>96.5</b>     | 0.5  |
| USNM245638      | 79.7            | 91.4           | <b>95.3</b>     | <b>96</b>       | <b>95.9</b>     | 35.6 |
| USNM245641      | 79.9            | 91.4           | <b>95.1</b>     | <b>95.7</b>     | <b>95.9</b>     | 97.5 |
| USNM245642      | 79.9            | 91.4           | <b>95.1</b>     | <b>95.7</b>     | <b>95.8</b>     | 96.2 |
| CAS222309       | 79.9            | 91.3           | <b>95</b>       | <b>95.7</b>     | <b>95.8</b>     | 95.2 |
| USNM223216      | 80              | 91.3           | <b>94.8</b>     | <b>95.5</b>     | <b>95.6</b>     | 96.5 |
| USNM142281      | 79.7            | 91.8           | <b>95.7</b>     | <b>96.3</b>     | <b>94.6</b>     | 96.1 |
| USNM374837      | 79.7            | 91.2           | <b>94.9</b>     | <b>95.6</b>     | <b>95.7</b>     | 22.8 |
| USNM357999      | 79.9            | 91.2           | <b>94.9</b>     | <b>95.5</b>     | <b>95.6</b>     | 95.6 |
| AMIB4247        | 79.7            | 91.2           | <b>94.8</b>     | <b>95.5</b>     | <b>95.7</b>     | 9.3  |
| AMI33715-016    | 79.7            | 91.2           | <b>94.9</b>     | <b>95.5</b>     | <b>95.6</b>     | 13.7 |
| USNM203781      | 79.6            | 91.2           | <b>95</b>       | <b>95.6</b>     | <b>95.6</b>     | 2.5  |
| CAS28515        | 79.6            | 91.1           | <b>94.9</b>     | <b>95.5</b>     | <b>95.6</b>     | 5.6  |
| Stubifer_GRA.1  | 79.9            | 91.1           | <b>94.7</b>     | <b>95.4</b>     | <b>95.5</b>     | 95.8 |
| CAS247233.2     | 79.9            | 91.1           | <b>94.7</b>     | <b>95.4</b>     | <b>95.5</b>     | 96.4 |
| USNM357892      | 79.6            | 91             | <b>94.7</b>     | <b>95.4</b>     | <b>95.6</b>     | 3.9  |

|                |      |      |             |             |             |      |
|----------------|------|------|-------------|-------------|-------------|------|
| Stubifer_M118  | 80   | 91   | <b>94.6</b> | <b>95.3</b> | <b>95.3</b> | 96.2 |
| CAS225045      | 80.1 | 91   | <b>94.7</b> | <b>95.3</b> | <b>95.3</b> | 96.1 |
| AMI18353-041   | 79.4 | 91.1 | <b>94.8</b> | <b>95.5</b> | <b>95.5</b> | 2.6  |
| USNM349778     | 79.9 | 91   | <b>94.6</b> | <b>95.2</b> | <b>95.3</b> | 95.8 |
| CAS223855      | 79.4 | 91   | <b>94.7</b> | <b>95.3</b> | <b>95.5</b> | 6.8  |
| USNM396981     | 79.9 | 90.9 | <b>94.6</b> | <b>95.2</b> | <b>95.3</b> | 96.1 |
| USNM341594     | 79.8 | 90.9 | <b>94.6</b> | <b>95.2</b> | <b>95.3</b> | 61.4 |
| AMI19450-018.2 | 79.4 | 91.1 | <b>94.7</b> | <b>95.4</b> | <b>95.4</b> | 45.3 |
| USNM430718     | 79.8 | 91   | <b>94.5</b> | <b>95.2</b> | <b>95.3</b> | 95.3 |
| USNM357884     | 79.6 | 90.8 | <b>94.5</b> | <b>95.2</b> | <b>95.5</b> | 33.3 |
| CAS223939      | 79.8 | 91.3 | <b>95</b>   | 93.2        | <b>95.8</b> | 12   |
| USNM357889     | 79.5 | 90.8 | <b>94.5</b> | <b>95.1</b> | <b>95.3</b> | 42.7 |
| USNM358001     | 79.3 | 90.6 | <b>94.5</b> | <b>95.1</b> | <b>95.3</b> | 3.2  |
| AMI20753-031   | 79.6 | 90.7 | 94.3        | <b>94.9</b> | <b>95.1</b> | 14.9 |
| USNM341595     | 79.8 | 90.5 | 94          | <b>94.6</b> | <b>94.7</b> | 95.5 |
| USNM374480     | 79.6 | 90.5 | 94          | <b>94.6</b> | <b>94.8</b> | 40.5 |
| AMI37933-007   | 79.5 | 90.2 | 94          | <b>94.6</b> | <b>95</b>   | 1.9  |
| CAS223978      | 79.9 | 91   | <b>94.6</b> | 88.6        | <b>95.4</b> | 95.4 |
| CAS223979      | 78.9 | 89.5 | 93.3        | 93.9        | 94.2        | 17.7 |
| USNM298542     | 78.6 | 89.4 | 93.3        | 93.7        | 94          | 0.1  |
| USNM357897     | 79.4 | 89.4 | 93          | 93.5        | 93.7        | 95   |
| USNM112099     | 78   | 89.3 | 93.3        | 93.8        | 94.1        | 3.7  |
| AMI19450-018.1 | 78.1 | 89.4 | 93.1        | 93.6        | 94          | 2.6  |
| AMIB4208       | 80.7 | 90.3 | 94          | <b>94.6</b> | 90          | 6.7  |
| AMI20353-001   | 77.5 | 87.8 | 91.8        | 92.1        | 92.6        | 2.3  |
| AMI18740-066   | 80.4 | 83.3 | 86.8        | 84.8        | 85.4        | 2.1  |

470

471

472

### **Data Availability Statement**

473

Sequence data associated with this study will be made publicly available prior to publication.

475

476

### **Author Contributions**

477

478

ALG conceived of the project and secured funding for the work. AF-P and ALG carried out the genomic methods and analyses. AMG assisted with the identification of specimens and analysis

479

480 of their associated metadata. All authors contributed to the discussion and interpretation of the  
481 results and to writing the manuscript. All authors approve of the submitted version of this  
482 manuscript.

483

#### 484 **Funding**

485

486 Funding was provided in part by a National Science Foundation Postdoctoral Research  
487 Fellowship in Biology (NSF-DBI-1711430) and by the National Institutes for Health (NIH-DP5-  
488 OD026405-01).

489

#### 490 **Conflict of Interest**

491

492 The authors declare that the research was conducted in the absence of any commercial or  
493 financial relationships that could be construed as a potential conflict of interest.

494

#### 495 **Acknowledgements**

496

497 We would like to acknowledge Athena Lam and California Academy of Science's Center for  
498 Comparative Genomics for technical support with our genomic methods as well as Joe Russack  
499 and James Henderson for their bioinformatics help and advice. Thank you to Luiz Rocha and  
500 Hudson Pinheiro for their collection efforts, Dave Catania and Mysi Hoang for their support with  
501 the museum specimens, and Jessica Herbert for her assistance in the lab. We also thank the  
502 Australian Museum and the Smithsonian National Museum of Natural History for access to their  
503 specimens for this project.

504

#### 505 **References**

506 Allio, R., Schomaker-Bastos, A., Romiguier, J., Prosdocimi, F., Nabholz, B., Delsuc, F. (2020).  
507 MitoFinder: Efficient automated large-scale extraction of mitogenomic data in target enrichment  
508 phylogenomics. *Mol Ecol Resour.* 20, 892–905. doi:10.1111/1755-0998.13160

509 Altschul, S. F., Gish, W., Miller, W., Myers, E. W., and Lipman, D. J. (1990). Basic local  
510 alignment search tool. *J. Mol. Biol.* 215, 403–410. doi:10.1016/S0022-2836(05)80360-2.

511 Ast, J. C., and Dunlap, P. V (2004). Phylogenetic analysis of the lux operon distinguishes two  
512 evolutionarily distinct clades of *Photobacterium leiognathi*. *Arch. Microbiol.* 181, 352–361.  
513 doi:10.1007/s00203-004-0663-7.

514 Baker, Lydia J et al. "Diverse deep-sea anglerfishes share a genetically reduced luminous  
515 symbiont that is acquired from the environment." *eLife*. 8 e47606. 1 Oct. 2019,  
516 doi:10.7554/eLife.47606

517 Bolger, A. M., Lohse, M., & Usadel, B. (2014). Trimmomatic: a flexible trimmer for Illumina  
518 sequence data. *Bioinformatics (Oxford, England)*, 30(15), 2114–2120.  
519 doi.org/10.1093/bioinformatics/btu170

520 Bright, M., and Bulgheresi, S. (2010). A complex journey: transmission of microbial symbionts.  
521 *Nat. Rev. Microbiol.* 8, 218–230. doi:10.1038/nrmicro2262.



- 522 Brown, M. V, Lauro, F. M., DeMaere, M. Z., Muir, L., Wilkins, D., Thomas, T., et al. (2012).  
523 Global biogeography of SAR11 marine bacteria. *Mol. Syst. Biol.* 8, 595.  
524 doi:10.1038/msb.2012.28.
- 525 Cavanaugh, C.M. (1994). Microbial symbiosis: patterns of diversity in the marine environment.  
526 *Amer Zool.* 34:79-89. doi:10.1093/icb/34.1.79.
- 527 Cingolani, P., Platts, A., Wang, L. L., Coon, M., Nguyen, T., Wang, L., et al. (2012). A program  
528 for annotating and predicting the effects of single nucleotide polymorphisms, SnpEff: SNPs in  
529 the genome of *Drosophila melanogaster* strain w1118; iso-2; iso-3. *Fly (Austin)*. 6, 80–92.  
530 doi:10.4161/fly.19695.
- 531 Darling, A. E., Jospin, G., Lowe, E., Matsen, F. A., Bik, H. M., and Eisen, J. A. (2014). PhyloSift:  
532 phylogenetic analysis of genomes and metagenomes. *PeerJ* 2, e243. doi:10.7717/peerj.243.
- 533 Davis, M. P., Sparks, J. S., and Smith, W. L. (2016). Repeated and widespread evolution of  
534 bioluminescence in marine fishes. *PLoS One* 11, 1–11. doi:10.1371/journal.pone.0155154.
- 535 Dunlap, P. V, Ast, J. C., Kimura, S., Fukui, A., and Yoshino, T. (2007). Cladistics in  
536 bioluminescent symbioses. *Fish. Res.* 23, 507–532. doi:10.1111/j.1096-0031.2007.00157.x
- 537 Dunlap, P. V., Gould, A. L., Wittenrich, M. L., and Nakamura, M. (2012). Symbiosis initiation in  
538 the bacterially luminous sea urchin cardinalfish *Siphamia versicolor*. *Journal of Fish Biology*,  
539 81(4), 1340-1356. Doi: 10.1111/j.1095-8649.2012.03415.x.
- 540 Dunlap, P. V., and Nakamura, M. (2011). Functional morphology of the luminescence system of  
541 *Siphamia versicolor* (Perciformes: Apogonidae), a bacterially luminous coral reef fish. *J.*  
542 *Morphol.* 272, 897–909. doi:10.1002/jmor.10956.
- 543 Dunlap, P. V, and Urbanczyk, H. (2013). “Luminous Bacteria BT - The Prokaryotes: Prokaryotic  
544 Physiology and Biochemistry,” in, eds. E. Rosenberg, E. F. DeLong, S. Lory, E. Stackebrandt,  
545 and F. Thompson (Berlin, Heidelberg: Springer Berlin Heidelberg), 495–528. doi:10.1007/978-3-  
546 642-30141-4\_75.
- 547 Edgar, R. C. (2004). MUSCLE: Multiple sequence alignment with high accuracy and high  
548 throughput. *Nucleic Acids Res.* 32, 1792–1797. doi:10.1093/nar/gkh340.
- 549 Fidopiastis, P. M., von Boletzky, S., and Ruby, E. G. (1998). A new niche for *Vibrio logei*, the  
550 predominant light organ symbiont of squids in the genus *Sepiola*. *J. Bacteriol.* 180, 59–64.  
551 doi:10.1128/JB.180.1.59-64.1998.
- 552 Galand, P. E., Potvin, M., Casamayor, E. O., and Lovejoy, C. (2010). Hydrography shapes  
553 bacterial biogeography of the deep Arctic Ocean. *ISME J.* 4, 564–576.  
554 doi:10.1038/ismej.2009.134.
- 555 Gon, O., and Allen, G. R. (2012). *Revision of the Indo-Pacific cardinalfish genus Siphamia*  
556 *(Perciformes: Apogonidae)*. doi:10.11646/zootaxa.3294.1.1.
- 557 Goris, J., Konstantinidis, K. T., Klappenbach, J. A., Coenye, T., Vandamme, P., and Tiedje, J.  
558 M. (2007). DNA–DNA hybridization values and their relationship to whole-genome sequence  
559 similarities. *Int. J. Syst. Evol. Microbiol.* 57, 81–91. doi:10.1099/ijs.0.64483-0.

- 560 Gould, A. L., and Dunlap, P. V (2019). Shedding light on specificity: population genomic  
561 structure of a symbiosis between a coral reef fish and luminous bacterium. *Front. Microbiol.* 10,  
562 2670. doi:10.3389/fmicb.2019.02670.
- 563 Gould, A. L., Harii, S., & Dunlap, P. V. (2014). Host preference, site fidelity, and homing  
564 behavior of the symbiotically luminous cardinalfish, *Siphamia tubifer* (Perciformes: Apogonidae).  
565 *Mar. Biol.* 161, 2897-2907. doi:10.1007/s00227-014-2554-z
- 566 Hendry, T. A., de Wet, J. R., and Dunlap, P. V (2014). Genomic signatures of obligate host  
567 dependence in the luminous bacterial symbiont of a vertebrate. *Environ. Microbiol.* 16, 2611–  
568 2622. doi:10.1111/1462-2920.12302.
- 569 Herrera, M., Klein, S. G., Campana, S., Chen, J. E., Prasanna, A., Duarte, C. M., and Aranda,  
570 M. (2020). Temperature transcends partner specificity in the symbiosis establishment of a  
571 cnidarian. *ISME J*, 1013. doi:10.1038/s41396-020-00768-y
- 572 Hinkle, G., Wetterer, J. K., Schultz, T. R., and Sogin, M. L. (1994). Phylogeny of the attine ant  
573 fungi based on analysis of small subunit ribosomal RNA gene sequences. *Science* (80- ). 266,  
574 1695 LP – 1697. doi:10.1126/science.7992052.
- 575 Hykin S.M., Bi K., McGuire J.A. (2015). Fixing formalin: a method to recover genomic-scale  
576 DNA sequence data from formalin-fixed museum specimens using high-throughput sequencing.  
577 *PLOS ONE* 10(10): e0141579. doi:10.1371/journal.pone.0141579
- 578 Jain, C., Rodriguez-R, L. M., Phillippy, A. M., Konstantinidis, K. T., and Aluru, S. (2018). High  
579 throughput ANI analysis of 90K prokaryotic genomes reveals clear species boundaries. *Nat.*  
580 *Commun.*, 9(1), 1-8. doi:10.1038/s41467-018-07641-9
- 581 Jombart, T., Balloux F. and Dray, S (2010). adephylo: exploratory analyses for the phylogenetic  
582 comparative method. *Bioinformatics*, 26(15), pp.1-21. doi:10.1093/bioinformatics/btq292
- 583 Jones, B. W., Lopez, J. E., Huttenburg, J., and Nishiguchi, M. K. (2006). Population structure  
584 between environmentally transmitted vibrios and bobtail squids using nested clade analysis.  
585 *Mol. Ecol.* 15, 4317–4329. doi:10.1111/j.1365-294X.2006.03073.x.
- 586 Jones, B. W., A. Maruyama, C. C. Ouverney, and M. K. Nishiguchi. 2007. Spatial and temporal  
587 distribution of the Vibrionaceae in coastal waters of Hawaii, Australia, and France. *Microb. Ecol.*  
588 54:314–323. doi:10.1007/s00248-006-9204-z.
- 589 Kaeding, A. J., Ast, J. C., Pearce, M. M., Urbanczyk, H., Kimura, S., Endo, H., et al. (2007).  
590 Phylogenetic Diversity and Cosymbiosis in the Bioluminescent Symbioses of “Photobacterium  
591 mandapamensis”. *Appl. Environ. Microbiol.* 73, 3173 LP – 3182. doi:10.1128/AEM.02212-06.
- 592 Kikuchi Y, Hosokawa T, Fukatsu T. Insect-microbe mutualism without vertical transmission: a  
593 stinkbug acquires a beneficial gut symbiont from the environment every generation. *Appl.*  
594 *Environ. Microbiol.* 2007;73:4308–4316. doi:10.1128/AEM.00067-07.
- 595 Koch, E. J., Miyashiro, T., McFall-Ngai, M. J., and Ruby, E. G. (2014). Features governing  
596 symbiont persistence in the squid–vibrio association. *Mol. Ecol.*, 23(6), 1624-1634. doi:  
597 10.1111/mec.12474.

- 598 Kozlov, A. M., Darriba, D., Flouri, T., Morel, B., and Stamatakis, A. (2019). RAxML-NG: a fast,  
599 scalable and user-friendly tool for maximum likelihood phylogenetic inference. *Bioinformatics*,  
600 35(21), 4453-4455. doi:10.1093/bioinformatics/btz305.
- 601 Li, H. (2013). Aligning sequence reads, clone sequences and assembly contigs with BWA-MEM.  
602 arXiv preprint arXiv:1303.3997 <http://arxiv.org/abs/1303.3997>.
- 603 Litsios, G., Sims, C. A., Wüest, R. O., Pearman, P. B., Zimmermann, N. E., and Salamin, N.  
604 (2012). Mutualism with sea anemones triggered the adaptive radiation of clownfishes. *BMC*  
605 *Evol. Biol.* 12. doi:10.1186/1471-2148-12-212.
- 606 Mabuchi, K., Fraser, T. H., Song, H., Azuma, Y., and Nishida, M. (2014). Revision of the  
607 systematics of the cardinalfishes (Percomorpha: Apogonidae) based on molecular analyses and  
608 comparative reevaluation of morphological characters. *Zootaxa*; Vol 3846, No 2 1 Aug. 2014.  
609 doi:10.11646/zootaxa.3846.2.1.
- 610 Matias, A. M., and Hereward, J. (2018). The complete mitochondrial genome of the five-lined  
611 cardinalfish *Cheilodipterus quinquelineatus* (Apogonidae). *Mitochondrial DNA Part B*, 3(2), 521-  
612 522. doi:10.1080/23802359.2018.1467221
- 613 Moran, N.A. (2006). Symbiosis. *Curr. Biol.* 16, R866–871. doi:10.1016/j.cub.2006.09.019
- 614 Moran, N. A., McCutcheon, J. P., and Nakabachi, A. (2008). Genomics and evolution of  
615 heritable bacterial symbionts. *Annu. Rev. Genet.* 42, 165–190.  
616 doi:10.1146/annurev.genet.41.110306.130119.
- 617 Nishiguchi, M. K. (2000). Temperature affects species distribution in symbiotic populations of  
618 *Vibrio* spp. *Appl. Environ. Microbiol.* 66, 3550–3555. doi:10.1128/aem.66.8.3550-3555.2000.
- 619 Nishiguchi, M. K., and Nair, V. S. (2003). Evolution of symbiosis in the Vibrionaceae: a  
620 combined approach using molecules and physiology. *Int. J. Syst. Evol. Microbiol.* 53, 2019—  
621 2026. doi:10.1099/ijs.0.02792-0.
- 622 Norsworthy, A. N., and Visick, K. L. (2013). Gimme shelter: how *Vibrio fischeri* successfully  
623 navigates an animal's multiple environments. *Front. Microbiol.* 4, 356.  
624 doi:10.3389/fmicb.2013.00356.
- 625 Nguyen, L. T., Schmidt, H. A., Von Haeseler, A., and Minh, B. Q. (2015). IQ-TREE: a fast and  
626 effective stochastic algorithm for estimating maximum-likelihood phylogenies. *Mol. Biol. Evol.*,  
627 32(1), 268-274. doi:10.1093/molbev/msu300
- 628 Padgham, M. and M.D. Sumner (2020). geodist: Fast, Dependency-Free Geodesic Distance  
629 Calculations. R package version 0.0.4. <https://CRAN.R-project.org/package=geodist>.
- 630 Portik, D.M., and J.J. Wiens. (2020) SuperCRUNCH: A bioinformatics toolkit for creating and  
631 manipulating supermatrices and other large phylogenetic datasets. *Methods Ecol. Evol.*, 11:  
632 763-772. doi:10.1111/2041-210X.13392.
- 633 Reichelt, J. L., Nealson, K., and Hastings, J. W. (1977). The specificity of symbiosis: pony fish  
634 and luminescent bacteria. *Arch. Microbiol.* 112(2), 157-161. doi:10.1007/BF00429329

- 635 Revell, L. (2011). Phytools: An R package for phylogenetic comparative biology (and other  
636 things). *Methods Ecol. Evol.* 3, 217–223. doi:10.1111/j.2041-210X.2011.00169.x.
- 637 Ruane, S., and Austin, C. C. (2017). Phylogenomics using formalin-fixed and 100+ year-old  
638 intractable natural history specimens. *Mol. Ecol. Resources*, 17(5), 1003-1008.  
639 doi:10.1111/1755-0998.12655
- 640 Seemann, T. (2015). Snippy: fast bacterial variant calling from NGS reads. Snippy: fast bacterial  
641 variant calling from NGS reads.
- 642 Sul, W. J., Oliver, T. A., Ducklow, H. W., Amaral-Zettler, L. A., and Sogin, M. L. (2013). Marine  
643 bacteria exhibit a bipolar distribution. *Proc. Natl. Acad. Sci. U. S. A.* 110, 2342–2347.  
644 doi:10.1073/pnas.1212424110.
- 645 Taylor, M. W., Radax, R., Steger, D., and Wagner, M. (2007). Sponge-associated  
646 microorganisms: evolution, ecology, and biotechnological potential. *Microbiol. Mol. Biol. Rev.*  
647 71, 295–347. doi:10.1128/MMBR.00040-06.
- 648 Thacker, C. E., and Roje, D. M. (2009). Phylogeny of cardinalfishes (Teleostei: Gobiiformes:  
649 Apogonidae) and the evolution of visceral bioluminescence. *Mol. Phylogenet. Evol.* 52, 735—  
650 745. doi:10.1016/j.ympev.2009.05.017.
- 651 Thompson, J. R., Pacocha, S., Pharino, C., Klepac-Ceraj, V., Hunt, D. E., Benoit, J., et al.  
652 (2005). Genotypic diversity within a natural coastal bacterioplankton population. *Science* 307,  
653 1311–1313. doi:10.1126/science.1106028.
- 654 Troussellier, M., Escalas, A., Bouvier, T., and Mouillot, D. (2017). Sustaining rare marine  
655 microorganisms: macroorganisms as repositories and dispersal agents of microbial  
656 diversity. *Front. Microbiol.*, 8, 947. doi:10.3389/fmicb.2017.00947
- 657 Tyberghein, L., Verbruggen, H., Pauly, K., Troupin, C., Mineur, F. and De Clerck, O. (2012),  
658 Bio-ORACLE: a global environmental dataset for marine species distribution modelling. *Global*  
659 *Ecol. Biogeogr.*, 21: 272-281. doi:10.1111/j.1466-8238.2011.00656.x
- 660 Urbanczyk, H., Ogura, Y., Hendry, T. A., Gould, A. L., Kiwaki, N., Atkinson, J. T., Hayashi T.,  
661 and Dunlap, P. V. (2011). Genome sequence of *Photobacterium mandapamensis* strain svers.  
662 1.1, the bioluminescent symbiont of the cardinal fish *Siphamia versicolor*. *J. Bacteriol.* 193 (12)  
663 3144-3145; DOI: 10.1128/JB.00370-11.
- 664 Wada, M., Kamiya, A., Uchiyama, N., Yoshizawa, S., Kita-Tsukamoto, K., Ikejima, K., et al.  
665 (2006). LuxA gene of light organ symbionts of the bioluminescent fish *Acropoma japonicum*  
666 (Acropomatidae) and *Siphamia versicolor* (Apogonidae) forms a lineage closely related to that  
667 of *Photobacterium leiognathi* ssp. *mandapamensis*. *FEMS Microbiol. Lett.* 260, 186—192.  
668 doi:10.1111/j.1574-6968.2006.00322.x.
- 669 Wägele, H. (2004). Potential key characters in Opisthobranchia (Gastropoda, Mollusca)  
670 enhancing adaptive radiation. *Org. Divers. Evol.* 4, 175–188. doi:10.1016/j.ode.2004.03.002.
- 671 Wallin, I.E. Symbioticism and the origin of species. (Williams & Wilkins company, 1927).

- 672 Wolfe, A. J., Millikan, D. S., Campbell, J. M., and Visick, K. L. (2004). *Vibrio fischeri* sigma54  
673 controls motility, biofilm formation, luminescence, and colonization. *Appl. Environ. Microbiol.* 70,  
674 2520–2524. doi:10.1128/aem.70.4.2520-2524.2004.
- 675 Wollenberg, M. S., and Ruby, E. G. (2009). Population structure of *Vibrio fischeri* within the light  
676 organs of *Euprymna scolopes* squid from two Oahu (Hawaii) populations. *Appl. Environ.*  
677 *Microbiol.*, 75(1), 193-202. DOI: 10.1128/AEM.01792-08.
- 678 Zamborsky, D. J., and Nishiguchi, M. K. (2011). Phylogeographical patterns among  
679 mediterranean sepiolid squids and their vibrio symbionts: Environment drives specificity among  
680 sympatric species. *Appl. Environ. Microbiol.* 77, 642–649. doi:10.1128/AEM.02105-10.
- 681

682 **Supplementary Information**  
 683

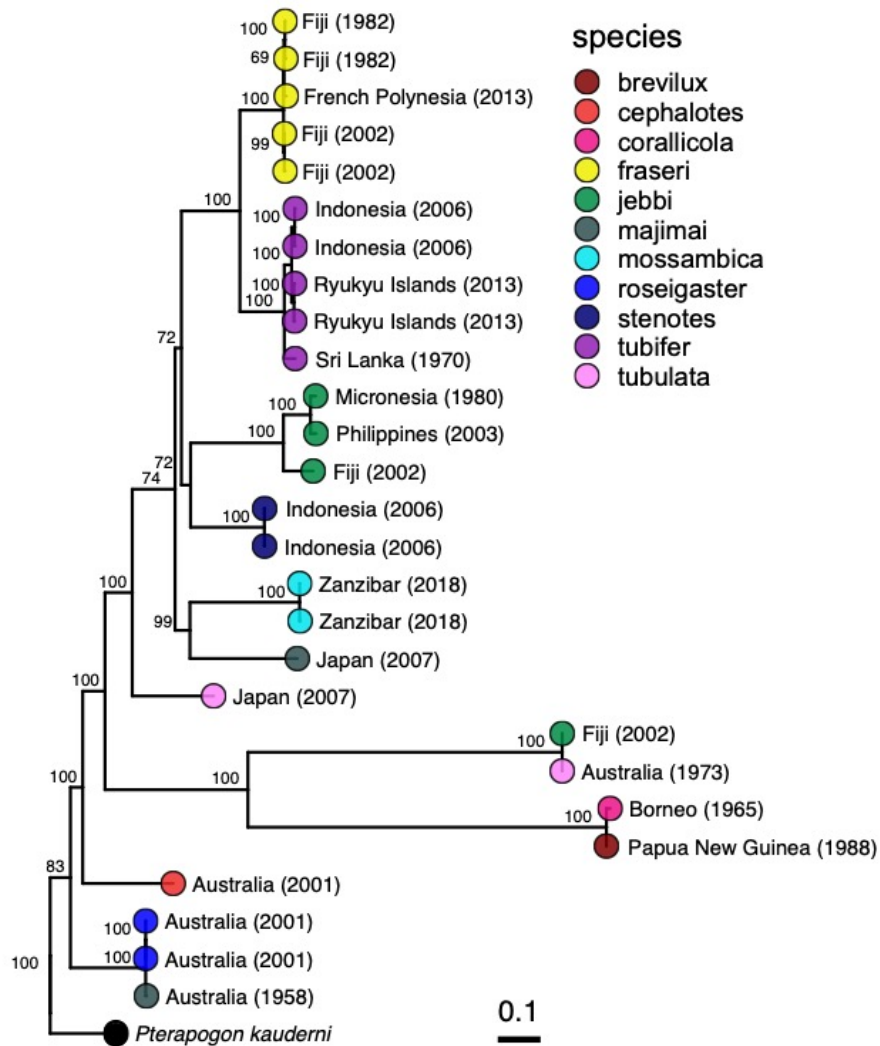

684 **Figure S1.** Maximum likelihood phylogeny of *Siphamia* based on a concatenated supermatrix of 15 mtDNA gene  
 685 sequences (*ATP6*, *ATP8*, *COXI*, *COX2*, *COX3*, *CYTB*, *ND1*, *ND2*, *ND3*, *ND4*, *ND4L*, *ND5*, *ND6*, *16S*, *18S*). Species  
 686 identities are indicated by the branch tip colors and the sampling location and year of each specimen is listed in the  
 687 branch label.  
 688  
 689  
 690  
 691



Table S1. Information for the *Siphamia* specimens sampled and their corresponding sequence information. Listed are each specimen's catalog number or unique identifier, species identification, sampling location and year, the standard length of the individual sampled, the total amount of double stranded DNA extracted from the light organ, the raw number of sequence reads, the number of reads that passed quality filtering and were trimmed, the number of reads that aligned to the symbiont reference genome (*P. mandapamensis* strain svers1.1), the percent of the symbiont reference genome covered at 10x sequence read depth, the total number of SNPs identified for each symbiont relative to the reference genome, the type of sequencing that was carried out, and the kit used for sequence library preparation. Specimens with decimals after their catalog number or unique identifier indicate that more than one individual was sampled from the same specimen lot.

| Specimen ID    | Species     | Location  | Year | Length (cm) | Total dsDNA (ng) | Raw      | Trimmed  | Aligned | %10x | SNPs   | Sequence Run  | Library Prep |
|----------------|-------------|-----------|------|-------------|------------------|----------|----------|---------|------|--------|---------------|--------------|
| AMI18353-041   | jebbi       | Fiji      | 1974 | 1.69        | <2               | 28258958 | 26861780 | 187425  | 0.5  | 0      | HiSeq 2x150   | Swift        |
|                |             |           |      |             |                  | 27257752 | 26799476 | 407326  | 1    | 166    | NovaSeq 2x150 | Swift        |
| AMI18740-066   | jebbi       | Australia | 1975 | 1.46        | <2               | 40906024 | 39209732 | 306641  | 2.1  | 0      | HiSeq 2x150   | Swift        |
| AMI19450-018.1 | tubifer     | Australia | 1975 | 2.94        | 3                | 58651761 | 56851489 | 442960  | 2.6  | 0      | HiSeq 2x150   | Swift        |
| AMI19450-018.2 | tubifer     | Australia | 1975 | 3.62        | 3.5              | 33895456 | 32610468 | 1337245 | 23.2 | 10     | HiSeq 2x150   | NEB Ultra II |
|                |             |           |      |             |                  | 24526375 | 23858943 | 1042258 | 16.4 | 5,435  | NovaSeq 2x150 | NEB Ultra II |
| AMI20353-001   | majimai     | Australia | 1972 | 1.67        | <2               | 39503975 | 38494612 | 344674  | 2.3  | 1      | HiSeq 2x150   | Swift        |
| AMI20753-031   | tubulata    | Australia | 1979 | 2.56        | <2               | 35965027 | 35217790 | 1085963 | 14.9 | 6,916  | NovaSeq 2x150 | Swift        |
| AMI33715-016   | jebbi       | Australia | 1993 | 1.46        | 2.2              | 35229540 | 33924547 | 359824  | 1.9  | 0      | HiSeq 2x150   | Swift        |
|                |             |           |      |             |                  | 33504802 | 33190608 | 655297  | 5    | 862    | NovaSeq 2x150 | Swift        |
| AMI37933-007   | tubifer     | Vanuatu   | 1997 | 2.19        | 52.1             | 3604557  | 2090383  | 219645  | 0.1  | 47     | NovaSeq 2x150 | NEB Ultra II |
|                |             |           |      |             |                  | 49624926 | 48314012 | 498902  | 1.9  | 0      | HiSeq 2x150   | Swift        |
| AMI40838-008   | cephalotes  | Australia | 2001 | 3.07        | 52.8             | 34771013 | 34092047 | 5099255 | 92.3 | 70,709 | NovaSeq 2x150 | NEB Ultra II |
| AMI40865-004.1 | roseigaster | Australia | 2001 | 4.56        | 74.1             | 91467705 | 89885499 | 6944692 | 93.4 | 72,219 | NovaSeq 2x150 | NEB Ultra II |
| AMI40865-004.2 | roseigaster | Australia | 2001 | 4.55        | 4.6              | 48426323 | 46531047 | 654416  | 5.9  | 1,588  | HiSeq 2x150   | Swift        |
| AMIB4208       | majimai     | Australia | 1958 | 2.31        | <2               | 36877472 | 34915450 | 467033  | 6.4  | 2      | HiSeq 2x150   | Swift        |
|                |             |           |      |             |                  | 87751    | 55995    | 12134   | 0    | 0      | NovaSeq 2x150 | Swift        |



|               |            |                |      |      |        |          |          |          |      |        |               |              |
|---------------|------------|----------------|------|------|--------|----------|----------|----------|------|--------|---------------|--------------|
| AMIB4247      | tubifer    | Vanuatu        | 1959 | 2.01 | <2     | 28358555 | 27422784 | 269641   | 2    | 0      | HiSeq 2x150   | Swift        |
|               |            |                |      |      |        | 23520680 | 23130431 | 584903   | 2.9  | 1,633  | NovaSeq 2x150 | Swift        |
| CAS247233.1   | mossambica | Zanzibar       | 2018 | 2.55 | 542    | 5478617  | 5384608  | 454932   | 76.9 | 8,112  | HiSeq 1x150   | SparQ        |
| CAS247233.2   | mossambica | Zanzibar       | 2018 | 2.92 | 1530   | 75836474 | 73645413 | 33775734 | 96.4 | 15,579 | NovaSeq 2x150 | NEB Ultra II |
| CAS222309     | jebbi      | Fiji           | 2002 | -    | 10.2   | 50665038 | 45699796 | 28523692 | 95.2 | 21,238 | NovaSeq 2x150 | NEB Ultra II |
| CAS223855     | jebbi      | Fiji           | 2002 | -    | <2     | 44113541 | 41855479 | 377420   | 2.4  | 3      | HiSeq 2x150   | Swift        |
|               |            |                |      |      |        | 33488272 | 33006205 | 576345   | 2.8  | 469    | NovaSeq 2x150 | Swift        |
| CAS223939.1   | jebbi      | Fiji           | 2002 | 2.35 | 11.8   | 28012894 | 21498132 | 225577   | 4.3  | 63     | HiSeq 1x150   | SparQ        |
| CAS223939.2   | jebbi      | Fiji           | 2002 | 1.81 | 8.9    | 11046726 | 10551137 | 716650   | 12   | 7,698  | NovaSeq 2x150 | NEB Ultra II |
| CAS223978.1   | unknown    | Fiji           | 2002 | 3.68 | 178.5  | 330421   | 323250   | 32364    | 0.1  | 10     | HiSeq 1x150   | SparQ        |
| CAS223978.2   | unknown    | Fiji           | 2002 | 4.05 | 50.5   | 23063434 | 21244678 | 10747171 | 95.4 | 18,773 | NovaSeq 2x150 | NEB Ultra II |
| CAS223979.1   | fraseri    | Fiji           | 2002 | 2.8  | 9.2    | 24192691 | 22748353 | 328578   | 0.9  | 0      | HiSeq 2x150   | NEB Ultra II |
|               |            |                |      |      |        | 26735318 | 25635641 | 457797   | 1.1  | 7      | NovaSeq 2x150 | NEB Ultra II |
| CAS223979.2   | fraseri    | Fiji           | 2002 | 3.04 | 15.5   | 10467851 | 9981063  | 381078   | 17.7 | 72     | HiSeq 1x150   | SparQ        |
| CAS225045     | jebbi      | Fiji           | 1999 |      | 3.4    | 21590245 | 20304117 | 15184111 | 96.1 | 18,316 | NovaSeq 2x150 | NEB Ultra II |
| CAS27441      | tubifer    | Philippines    | 1931 | 3.26 | 1.8    | 18607665 | 18124484 | 1483134  | 95.3 | 18,841 | HiSeq 1x150   | SparQ        |
| CAS28515      | tubulata   | Australia      | 1973 | -    | <2     | 36559960 | 33708337 | 213670   | 1    | 2      | HiSeq 2x150   | Swift        |
|               |            |                |      |      |        | 35922973 | 35323462 | 589696   | 3.1  | 1,301  | NovaSeq 2x150 | Swift        |
| CAS84356      | tubifer    | Palau          | 2012 | 1.9  | 38.9   | 48287910 | 38767642 | 6258850  | 64.8 | 13,661 | HiSeq 1x150   | SparQ        |
| Stubifer_M118 | tubifer    | Ryukyu Islands | 2013 | 1.3  | 26.5   | 75237177 | 72661256 | 57068084 | 96.2 | 16,828 | HiSeq 2x150   | Swift        |
| Smajimai_PVD  | majimai    | Japan          | 2007 | 2.61 | 8949   | 36930530 | 35957911 | 26787137 | 94.8 | 70,889 | NovaSeq 2x150 | NEB Ultra II |
| Stubulata_PVD | tubulata   | Japan          | 2007 | 2.12 | 1225.5 | 34195315 | 33077310 | 21855337 | 95.1 | 66,583 | NovaSeq 2x150 | NEB Ultra II |
| Stubifer_S27  | tubifer    | Ryukyu Islands | 2013 | 2.65 | -      | 7403111  | 7277173  | 517331   | 88.9 | 19,790 | HiSeq 1x150   | SparQ        |

|                 |              |                  |      |      |       |           |           |           |      |         |               |              |
|-----------------|--------------|------------------|------|------|-------|-----------|-----------|-----------|------|---------|---------------|--------------|
| Sstenotes_GRA.1 | stenotes     | Indonesia        | 2006 | 1.89 | 115.9 | 22315393  | 24640343  | 21426979  | 95.8 | 24,716  | NovaSeq 2x150 | NEB Ultra II |
| Sstenotes_GRA.2 | stenotes     | Indonesia        | 2006 | 1.98 | 308   | 467708    | 426870    | 85208     | 0.5  | 23      | HiSeq 1x150   | SparQ        |
| Stubifer_GRA.1  | tubifer      | Indonesia        | 2006 | 2.39 | 96    | 23365446  | 22298866  | 6159687   | 95.8 | 18,701  | NovaSeq 2x150 | NEB Ultra II |
| Stubifer_GRA.2  | tubifer      | Indonesia        | 2006 | 2.85 | 95.9  | 9455319   | 8509771   | 452475    | 52   | 3,041   | HiSeq 1x150   | SparQ        |
| USNM112099      | elongata     | Philippines      | 1909 | 3.46 | <2    | 49945895  | 48231023  | 430697    | 3.7  | 8       | HiSeq 2x150   | Swift        |
| USNM142281.1    | fuscolineata | Marshall Islands | 1946 | 2.2  | <2    | 16213148  | 15893522  | 6118510   | 96.1 | 15,366  | NovaSeq 2x150 | Swift        |
| USNM142281.2    | fuscolineata | Marshall Islands | 1946 | 2.76 | 10.1  | 39670892  | 27192174  | 695872    | 62.8 | 381     | HiSeq 1x150   | NEB Ultra II |
| USNM203781      | corallicola  | Borneo           | 1965 | 2.58 | <2    | 33588104  | 32488841  | 640895    | 0.6  | 0       | HiSeq 2x150   | Swift        |
|                 |              |                  |      |      |       | 56446868  | 51658133  | 1237586   | 1.2  | 178     | NovaSeq 2x150 | Swift        |
| USNM223216      | jebbi        | Micronesia       | 1980 | 1.74 | 7     | 181380283 | 186040521 | 176746273 | 96.5 | 14,693  | NovaSeq 2x150 | NEB Ultra II |
| USNM245638      | jebbi        | Fiji             | 1982 | 2.07 | 2.2   | 36426337  | 34932628  | 508273    | 9.2  | 38      | HiSeq 2x150   | Swift        |
|                 |              |                  |      |      |       | 27073152  | 26801480  | 647893    | 13   | 2,188   | NovaSeq 2x150 | Swift        |
| USNM245641      | fraseri      | Fiji             | 1982 | 4.13 | 5.3   | 864701674 | 829515210 | 714629012 | 97.5 | 17,070* | NovaSeq 2x150 | NEB Ultra II |
| USNM245642      | fraseri      | Fiji             | 1982 | 3.65 | 13    | 35743393  | 35774905  | 33716527  | 96.2 | 16,396  | NovaSeq 2x150 | NEB Ultra II |
| USNM298542      | brevilux     | Papua New Guinea | 1988 | 2.24 | 21.1  | 662337    | 482006    | 148333    | 0.1  | 23      | NovaSeq 2x150 | NEB Ultra II |
|                 |              |                  |      |      |       | 49597285  | 47386221  | 486582    | 2.4  | 0       | HiSeq 2x150   | Swift        |
| USNM341594      | jebbi        | Tonga            | 1993 | 1.91 | <2    | 27318206  | 27030306  | 1313295   | 61.4 | 7,995   | NovaSeq 2x150 | Swift        |
| USNM341595      | tubifer      | Tonga            | 1993 | 3.87 | 7.8   | 18908174  | 17504661  | 4858215   | 94.2 | 725     | HiSeq 2x150   | NEB Ultra II |
|                 |              |                  |      |      |       | 11846770  | 11271717  | 2974122   | 88.1 | 17,900  | NovaSeq 2x150 | NEB Ultra II |
| USNM349778      | mossambica   | Mauritius        | 1995 | 2.36 | 15    | 33471029  | 32308812  | 12943283  | 95.8 | 18,219  | NovaSeq 2x150 | NEB Ultra II |
| USNM357884      | tubifer      | Philippines      | 1980 | 3.68 | 7.3   | 18374904  | 17191172  | 759889    | 8.5  | 1       | HiSeq 2x150   | NEB Ultra II |
|                 |              |                  |      |      |       | 13974418  | 12217495  | 879577    | 11.9 | 4,148   | NovaSeq 2x150 | NEB Ultra II |
| USNM357889      | spinicola    | Papua New Guinea | 1975 | 3.11 | 4.1   | 21853900  | 21329666  | 2042137   | 42.7 | 12,366  | NovaSeq 2x150 | NEB Ultra II |

|            |          |                   |      |      |       | 46425    | 42876    | 22       | 0    | 0      | HiSeq 2x150   | NEB Ultra II |
|------------|----------|-------------------|------|------|-------|----------|----------|----------|------|--------|---------------|--------------|
| USNM357892 | tubifer  | Red Sea           | 1969 | 3.35 | <2    | 35509177 | 33451543 | 215301   | 0.7  | 1      | HiSeq 2x150   | Swift        |
|            |          |                   |      |      |       | 27788827 | 27434566 | 542781   | 1.7  | 1,107  | NovaSeq 2x150 | Swift        |
| USNM357897 | tubifer  | Andaman           | 1963 | 4.09 | 3.9   | 26178035 | 25619280 | 9568200  | 95   | 17,295 | NovaSeq 2x150 | NEB Ultra II |
| USNM357999 | tubifer  | Sri Lanka         | 1970 | 2.94 | <2    | 54251311 | 53731832 | 26374339 | 95.6 | 22,417 | NovaSeq 2x150 | Swift        |
| USNM358001 | majimai  | Philippines       | 1978 | 2.1  | <2    | 38324209 | 36313447 | 254445   | 0.8  | 2      | HiSeq 2x150   | Swift        |
|            |          |                   |      |      |       | 33631537 | 33293817 | 428773   | 1.1  | 151    | NovaSeq 2x150 | Swift        |
| USNM374480 | majimai  | Australia         | 1966 | 1.97 | 2.1   | 63381524 | 62370257 | 1400945  | 40.5 | 8,157  | NovaSeq 2x150 | Swift        |
| USNM374837 | unknown  | Wallis and Futuna | 2000 | 1.96 | 12.1  | 10549216 | 7951371  | 985084   | 22.8 | 9,465  | NovaSeq 2x150 | NEB Ultra II |
|            |          |                   |      |      |       | 41856128 | 40302628 | 595029   | 10.7 | 11     | HiSeq 2x150   | Swift        |
| USNM396981 | stenotes | Indonesia         | 2006 | 1.89 | 153.9 | 36161679 | 35712980 | 34096922 | 96.1 | 16,892 | NovaSeq 2x150 | NEB Ultra II |
| USNM412731 | jebbi    | Philippines       | 2003 | 1.73 | 23.6  | 27071135 | 25964385 | 16604538 | 95.9 | 32,687 | NovaSeq 2x150 | NEB Ultra II |
| USNM430718 | fraseri  | French Polynesia  | 2013 | 3.34 | 58.9  | 18468382 | 17513981 | 2806955  | 95.3 | 20,592 | NovaSeq 2x150 | NEB Ultra II |

Table S2. Information for the *Siphamia COI* sequences that were used to construct the host phylogeny. Listed are each specimen's catalog number or unique identifier, species identification, sampling location, exact latitude and longitude, year, and the source of the sequence.

| Specimen ID    | Species     | Location  | Latitude | Longitude | Year | Source                     |
|----------------|-------------|-----------|----------|-----------|------|----------------------------|
| AMI40838-008   | cephalotes  | Australia | -33.840  | 151.185   | 2001 | this study                 |
| AMI40865-004-1 | roseigaster | Australia | -33.865  | 152.000   | 2001 | this study                 |
| AMI40865-004-2 | roseigaster | Australia | -33.865  | 152.000   | 2001 | this study                 |
| AMI41858-030   | roseigaster | Australia | -29.417  | 153.356   | 2002 | Mabuchi <i>et al.</i> 2014 |
| AWCF412        | goreni      | Red Sea   | 25.707   | 36.622    | 2016 | Atta <i>et al.</i> 2019    |
| AWCF713        | tubifer     | Red Sea   | 25.707   | 36.622    | 2016 | Atta <i>et al.</i> 2019    |

|                             |            |                |         |         |      |                               |
|-----------------------------|------------|----------------|---------|---------|------|-------------------------------|
| BW-A5255                    | fistulosa  | Australia      | -16.896 | 146.447 | 2005 | International Barcode of Life |
| CAS223855                   | jebbi      | Fiji           | -18.151 | 178.360 | 2002 | this study                    |
| CAS223978                   | fraseri    | Fiji           | -18.100 | 178.360 | 2002 | this study                    |
| CAS223979                   | fraseri    | Fiji           | -18.100 | 178.360 | 2002 | this study                    |
| CAS225045                   | jebbi      | Fiji           | -18.145 | 178.369 | 1999 | this study                    |
| CAS247233.1                 | mossambica | Zanzibar       | -6.220  | 39.171  | 2018 | this study                    |
| CAS247233.2                 | mossambica | Zanzibar       | -6.220  | 39.171  | 2018 | this study                    |
| CAS28515                    | tubulata   | Australia      | -14.202 | 144.260 | 1973 | this study                    |
| CSIRO-H-6648-02 (BW-A12333) | guttulata  | Australia      | -17.106 | 146.005 | 2004 | International Barcode of Life |
| CSIRO-H-7457-03 (BW-A12338) | guttulata  | Australia      | -12.579 | 143.478 | 2004 | International Barcode of Life |
| CSIRO-H-8482-02 (BW-A5590)  | cuneiceps  | Australia      | -22.123 | 150.334 | 2005 | International Barcode of Life |
| FAKU73087                   | tubulata   | Japan          | 32.743  | 132.561 | -    | Mabuchi <i>et al.</i> 2014    |
| FAKU78690                   | majimai    | Ryukyu Islands | 30.432  | 130.400 | -    | Mabuchi <i>et al.</i> 2014    |
| KU_Tissue4631 (CAS222309)   | jebbi      | Fiji           | -17.324 | 178.238 | 2002 | Mabuchi <i>et al.</i> 2014    |
| Stubifer_M118               | tubifer    | Ryukyu Islands | 26.656  | 127.880 | 2013 | this study                    |
| Smajimai_PVD                | majimai    | Japan          | 32.800  | 133.500 | 2007 | this study                    |
| Stubulata_PVD               | tubulata   | Japan          | 32.743  | 132.561 | 2007 | this study                    |
| Stubifer_S27                | tubifer    | Ryukyu Islands | 26.635  | 127.866 | 2013 | this study                    |
| SAIAB194663                 | paupuensis | Indonesia      | -2.220  | 130.564 | 2013 | Gon <i>et al.</i> 2014        |
| SAIAB194704                 | paupuensis | Indonesia      | -2.965  | 131.334 | 2013 | Gon <i>et al.</i> 2014        |
| Sstenotes_GRA.1             | stenotes   | Indonesia      | -3.870  | 133.981 | 2006 | this study                    |
| Sstenotes_GRA.2             | stenotes   | Indonesia      | -3.870  | 133.981 | 2006 | this study                    |
| Stubif_Kaeding              | tubifer    | Ryukyu Islands | 26.635  | 127.866 | 2006 | Kaeding <i>et al.</i> 2007    |

|                |             |                  |         |         |      |            |
|----------------|-------------|------------------|---------|---------|------|------------|
| Stubifer_GRA.1 | tubifer     | Indonesia        | -3.680  | 133.728 | 2006 | this study |
| Stubifer_GRA.2 | tubifer     | Indonesia        | -3.680  | 133.728 | 2006 | this study |
| USNM112099-2   | elongata    | Philippines      | 16.930  | 120.233 | 1909 | this study |
| USNM203781     | corallicola | Borneo           | 6.015   | 116.059 | 1965 | this study |
| USNM223216     | jebbi       | Micronesia       | 6.930   | 158.100 | 1980 | this study |
| USNM245638     | jebbi       | Fiji             | -19.161 | 179.756 | 1982 | this study |
| USNM245641     | fraseri     | Fiji             | -20.620 | 181.330 | 1982 | this study |
| USNM245642     | fraseri     | Fiji             | -20.620 | 181.330 | 1982 | this study |
| USNM298542-2   | brevilux    | Papua New Guinea | -5.230  | 145.750 | 1988 | this study |
| USNM349778     | mossambica  | Mauritius        | -20.188 | 57.400  | 1995 | this study |
| USNM357999     | tubifer     | Sri Lanka        | 8.602   | 81.226  | 1970 | this study |
| USNM358001     | majimai     | Philippines      | 9.383   | 123.258 | 1978 | this study |
| USNM396981     | stenotes    | Indonesia        | -3.960  | 134.355 | 2006 | this study |
| USNM412731     | jebbi       | Philippines      | 12.693  | 120.522 | 2003 | this study |
| USNM430718     | fraseri     | French Polynesia | -22.641 | 207.178 | 2013 | this study |

Table S3. Results of the nucleotide BLAST search of symbiont 16S rRNA genes. Listed are each specimen's catalog number or unique identifier, the percent of the reference 16S rRNA gene sequence (*Photobacterium leiognathi*, AY292917) covered at 10x sequence depth, the top matching sequence from the NCBI database including its accession number in parentheses, and the corresponding query coverage, E-value, and percent identity relative to that sequence.

| Specimen ID    | %10x  | Top hit                                                                   | Query coverage | E-value | % identity |
|----------------|-------|---------------------------------------------------------------------------|----------------|---------|------------|
| AMI18353-041   | 88.49 | Photobacterium leiognathi subsp. mandapamensis strain MahLm3 (JN380344.1) | 91%            | 0.0     | 86.08      |
| AMI18740-066   | 89.2  | Photobacterium leiognathi (AY292917.1)                                    | 93%            | 0.0     | 79.97      |
| AMI19450-018.1 | 98.25 | Photobacterium leiognathi strain LC1-277 (AB243248.1)                     | 90%            | 0.0     | 86.48      |

|                |       |                                                                                |     |     |        |
|----------------|-------|--------------------------------------------------------------------------------|-----|-----|--------|
| AMI19450-018.2 | 99.94 | Photobacterium leiognathi strain ljone1.1 (AY204494.1)                         | 94% | 0.0 | 95.96  |
| AMI20353-001   | 95.02 | Photobacterium leiognathi strain W214 (MF554624.1)                             | 89% | 0.0 | 83.82  |
| AMI20753-031   | 99.94 | Photobacterium leiognathi strain ljone1.1 (AY204494.1)                         | 94% | 0.0 | 95.14  |
| AMI33715-016   | 100   | Photobacterium mandapamensis seagl.1.4 (AY455873.1)                            | 95% | 0.0 | 84.58  |
| AMI37933-007   | 99.81 | Photobacterium mandapamensis seagl.1.4 (AY455873.1)                            | 95% | 0.0 | 95.93  |
| AMI40838-008   | 100   | Photobacterium leiognathi subsp. mandapamensis strain ATCC 27561 (NR_115206.1) | 95% | 0.0 | 99.93  |
| AMI40865-004.1 | 99.94 | Photobacterium leiognathi subsp. mandapamensis strain ATCC 27561 (NR_115206.1) | 95% | 0.0 | 99.86  |
| AMI40865-004.2 | 99.94 | Photobacterium leiognathi strain AK-MIE (MH746214.1)                           | 91% | 0.0 | 99.01  |
| AMIB4208       | 100   | Photobacterium leiognathi strain LC1-283 (AB243249.1)                          | 90% | 0.0 | 90.74  |
| AMIB4247       | 99.94 | Photobacterium leiognathi strain LC1-283 (AB243249.1)                          | 90% | 0.0 | 92.75  |
| CAS222309      | 100   | Photobacterium leiognathi subsp. mandapamensis strain ATCC 27561 (NR_115206.1) | 95% | 0.0 | 100.00 |
| CAS223855      | 100   | Photobacterium leiognathi strain LC1-283 (AB243249.1)                          | 88% | 0.0 | 86.35  |
| CAS223939.1    | 99.94 | Photobacterium leiognathi strain ljone1.1 (AY204494.1)                         | 94% | 0.0 | 99.04  |
| CAS223939.2    | 99.94 | Photobacterium mandapamensis seagl.1.1 (AY455871.1)                            | 94% | 0.0 | 97.67  |
| CAS223978.1    | 29.61 | Photobacterium leiognathi subsp. mandapamensis strain ATCC 27561 (NR_115206.1) | 95% | 0.0 | 99.73  |
| CAS223978.2    | 100   | Photobacterium mandapamensis seagl.1.1 (AY455871.1)                            | 94% | 0.0 | 100.00 |
| CAS223979.1    | 99.94 | Photobacterium leiognathi strain LC1-277 (AB243248.1)                          | 90% | 0.0 | 94.88  |
| CAS223979.2    | 99.94 | Photobacterium leiognathi subsp. mandapamensis strain ATCC 27561 (NR_115206.1) | 95% | 0.0 | 100.00 |
| CAS225045      | 100   | Photobacterium leiognathi subsp. mandapamensis strain ATCC 27561 (NR_115206.1) | 95% | 0.0 | 100.00 |
| CAS247233.1    | 100   | Photobacterium mandapamensis seagl.1.1 (AY455871.1)                            | 94% | 0.0 | 100.00 |
| CAS247233.2    | 99.94 | Photobacterium leiognathi subsp. mandapamensis strain ATCC 27561 (NR_115206.1) | 95% | 0.0 | 100.00 |
| CAS27441       | 100   | Photobacterium leiognathi subsp. mandapamensis strain ATCC 27561 (NR_115206.1) | 95% | 0.0 | 100.00 |
| CAS28515       | 100   | Photobacterium leiognathi subsp. mandapamensis strain MahLm3 (JN380344.1)      | 92% | 0.0 | 84.13  |

|                 |       |                                                                                |     |     |        |
|-----------------|-------|--------------------------------------------------------------------------------|-----|-----|--------|
| CAS84356        | 99.94 | Photobacterium leiognathi subsp. mandapamensis strain ATCC 27561 (NR_115206.1) | 95% | 0.0 | 99.93  |
| Smajimai_PVD    | 100   | Photobacterium leiognathi subsp. mandapamensis strain ATCC 27561 (NR_115206.1) | 95% | 0.0 | 99.93  |
| Sstenotes_GRA.1 | 100   | Photobacterium leiognathi subsp. mandapamensis strain ATCC 27561 (NR_115206.1) | 95% | 0.0 | 100.00 |
| Sstenotes_GRA.2 | 99.94 | Photobacterium leiognathi subsp. mandapamensis strain ATCC 27561 (NR_115206.1) | 95% | 0.0 | 99.73  |
| Stubifer_GRA.1  | 100   | Photobacterium leiognathi subsp. mandapamensis strain ATCC 27561 (NR_115206.1) | 95% | 0.0 | 100.00 |
| Stubifer_GRA.2  | 99.94 | Photobacterium leiognathi subsp. mandapamensis strain ATCC 27561 (NR_115206.1) | 95% | 0.0 | 99.93  |
| Stubifer_M118   | 100   | Photobacterium leiognathi subsp. mandapamensis strain ATCC 27561 (NR_115206.1) | 95% | 0.0 | 99.93  |
| Stubifer_S27    | 99.94 | Photobacterium leiognathi subsp. mandapamensis strain ATCC 27561 (NR_115206.1) | 95% | 0.0 | 100.00 |
| Stubulata_PVD   | 100   | Photobacterium leiognathi subsp. mandapamensis strain ATCC 27561 (NR_115206.1) | 95% | 0.0 | 99.93  |
| USNM112099      | 92.18 | Photobacterium leiognathi strain AK5 (AB243232.1)                              | 90% | 0.0 | 85.57  |
| USNM142281.1    | 99.94 | Photobacterium leiognathi subsp. mandapamensis strain ATCC 27561 (NR_115206.1) | 95% | 0.0 | 100.00 |
| USNM142281.2    | 100   | Photobacterium leiognathi strain ljone1.1 (AY204494.1)                         | 93% | 0.0 | 94.36  |
| USNM203781      | 100   | Photobacterium leiognathi strain LC1-277 (AB243248.1)                          | 90% | 0.0 | 90.68  |
| USNM223216      | 100   | Photobacterium leiognathi subsp. mandapamensis strain ATCC 27561 (NR_115206.1) | 95% | 0.0 | 100.00 |
| USNM245638      | 100   | Photobacterium leiognathi strain AK5 (AB243232.1)                              | 90% | 0.0 | 93.11  |
| USNM245641      | 100   | Photobacterium leiognathi subsp. mandapamensis strain ATCC 27561 (NR_115206.1) | 95% | 0.0 | 99.93  |
| USNM245642      | 100   | Photobacterium leiognathi subsp. mandapamensis strain ATCC 27561 (NR_115206.1) | 95% | 0.0 | 100.00 |
| USNM298542      | 99.94 | Photobacterium leiognathi subsp. mandapamensis strain MahLm3 (JN380344.1)      | 91% | 0.0 | 82.60  |
| USNM341594      | 100   | Photobacterium leiognathi subsp. mandapamensis strain MahLm3 (JN380344.1)      | 92% | 0.0 | 93.40  |
| USNM341595      | 100   | Photobacterium leiognathi subsp. mandapamensis strain ATCC 27561 (NR_115206.1) | 95% | 0.0 | 100.00 |
| USNM349778      | 100   | Photobacterium leiognathi subsp. mandapamensis strain ATCC 27561 (NR_115206.1) | 95% | 0.0 | 99.93  |
| USNM357884      | 100   | Photobacterium mandapamensis seagl.1.1 (AY455871.1)                            | 94% | 0.0 | 100.00 |
| USNM357889      | 100   | Photobacterium mandapamensis seagl.1.4 (AY455873.1)                            | 95% | 0.0 | 97.90  |



|            |       |                                                                                |     |     |        |
|------------|-------|--------------------------------------------------------------------------------|-----|-----|--------|
| USNM357892 | 100   | Photobacterium leiognathi strain LC1-277 (AB243248.1)                          | 90% | 0.0 | 91.53  |
| USNM357897 | 100   | Photobacterium leiognathi subsp. mandapamensis strain ATCC 27561 (NR_115206.1) | 95% | 0.0 | 99.93  |
| USNM357999 | 100   | Photobacterium leiognathi subsp. mandapamensis strain ATCC 27561 (NR_115206.1) | 95% | 0.0 | 99.93  |
| USNM358001 | 100   | Photobacterium leiognathi strain LC1-277 (AB243248.1)                          | 90% | 0.0 | 87.62  |
| USNM374480 | 100   | Photobacterium leiognathi strain LC1-283 (AB243249.1)                          | 90% | 0.0 | 91.82  |
| USNM374837 | 100   | Photobacterium leiognathi subsp. mandapamensis strain MahLm3 (JN380344.1)      | 91% | 0.0 | 87.07  |
| USNM396981 | 100   | Photobacterium leiognathi strain lleuc1.1 (AY204495.1)                         | 94% | 0.0 | 100.00 |
| USNM412731 | 100   | Photobacterium leiognathi subsp. mandapamensis strain ATCC 27561 (NR_115206.1) | 95% | 0.0 | 100.00 |
| USNM430718 | 99.94 | Photobacterium leiognathi subsp. mandapamensis strain ATCC 27561 (NR_115206.1) | 95% | 0.0 | 100.00 |
